# Supplementary material
Source: PubMed Central journal article supplement (PMC2768231)
Supplement: NIHMS140495-supplement-1_si_001.pdf [file NIHMS140495-supplement-1_si_001.pdf]

# New Insights into Solvolysis and Reorganization Energy from Gas-Phase, Electrochemical, and Theoretical Studies of Oxo-Tp\*Mo(V) Compounds.

*Aaron K. Vannucci, Rae Ana Snyder<sup>1</sup>, Nadine E. Gruhn, Dennis L. Lichtenberger\*, and John H. Enemark\**

Contribution from the Department of Chemistry and Biochemistry, The University of Arizona, Tucson,  
AZ 85721-0041

AUTHOR EMAIL ADDRESS [jenemark@u.arizona.edu](mailto:jenemark@u.arizona.edu), [dlichten@email.arizona.edu](mailto:dlichten@email.arizona.edu)

## **Contents:**

Figures SI-1 to SI-5: Cyclic voltammograms of complexes **A** – **E**. Figures SI-6 to SI-18: Calculated structures. Figures SI-19 to SI-20: Correlation plots of alkoxide and diolato molecules. Tables of optimized atomic coordinates.

---

<sup>1</sup> Present address: Department of Chemistry , Stanford University, Stanford, CA.

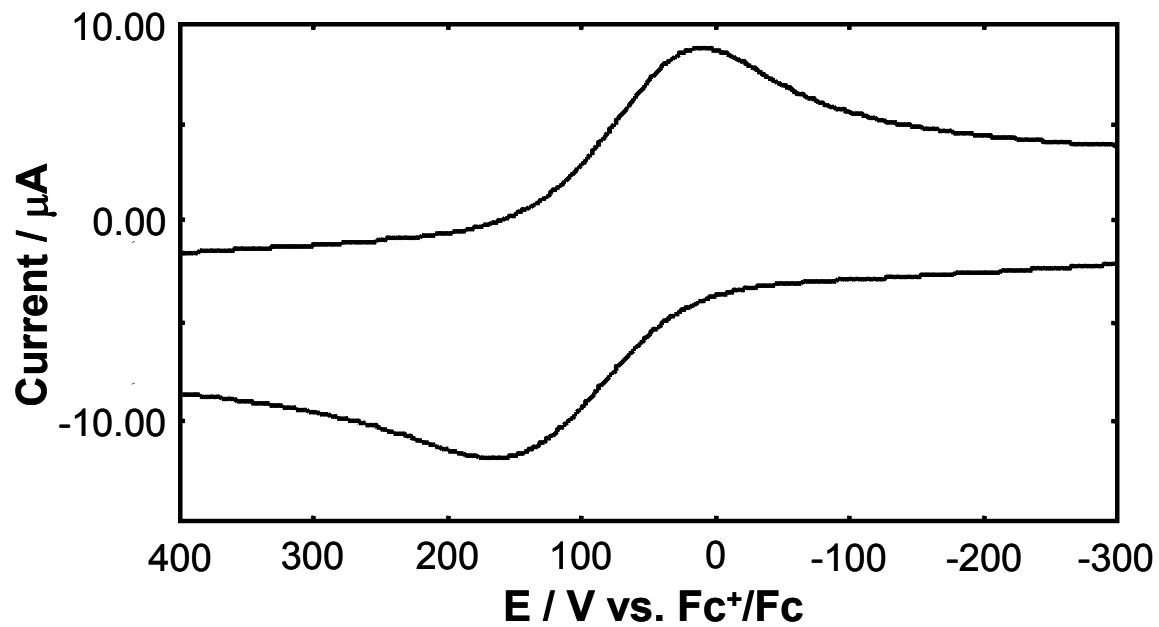

Figure SI-1. Cyclic voltammogram of  $\text{Tp}^*\text{MoO}(\text{OCH}_3)_2$  (A). Experimental conditions in methods section.

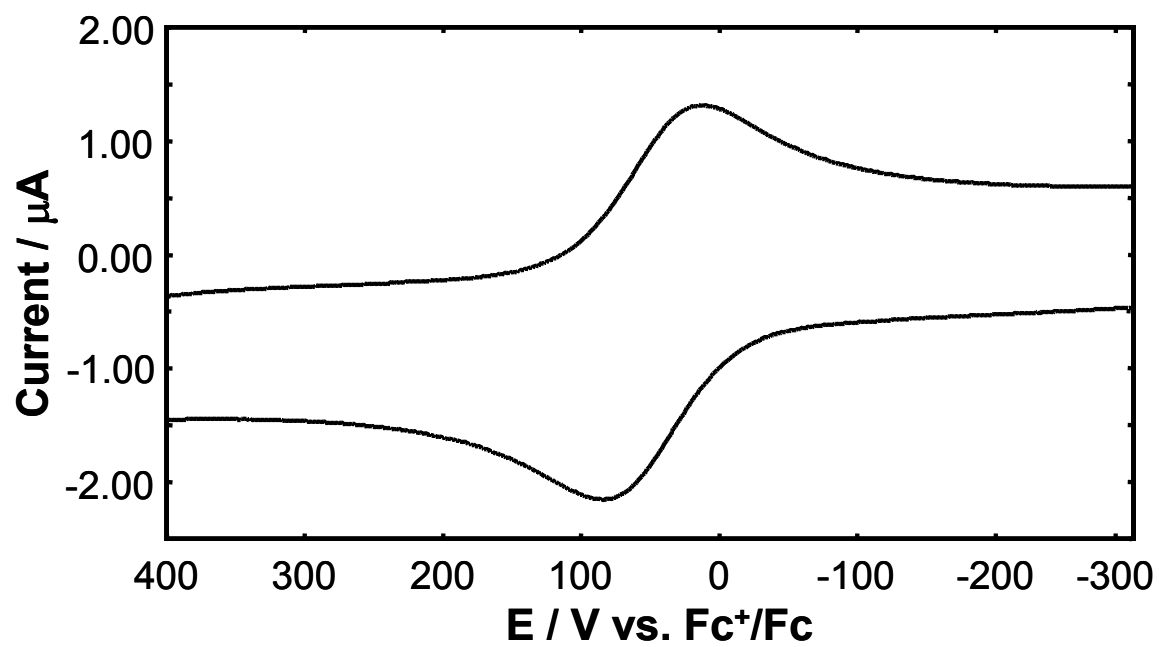

Figure SI-2. Cyclic voltammogram of  $\text{Tp}^*\text{MoO}(\text{OCH}_2\text{CH}_3)_2$  (**B**). Experimental conditions in methods section.

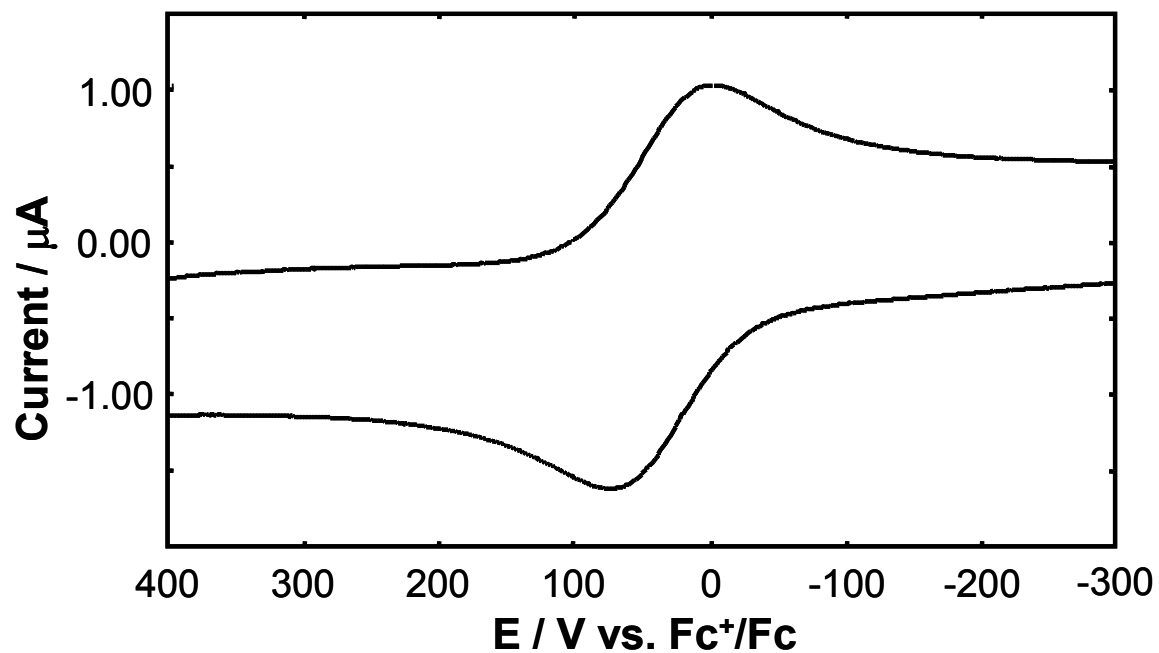

Figure SI-3. Cyclic voltammogram of  $\text{Tp}^*\text{MoO}(\text{OCH}_2\text{CH}_2\text{CH}_3)_2$  (C). Experimental conditions in methods section.

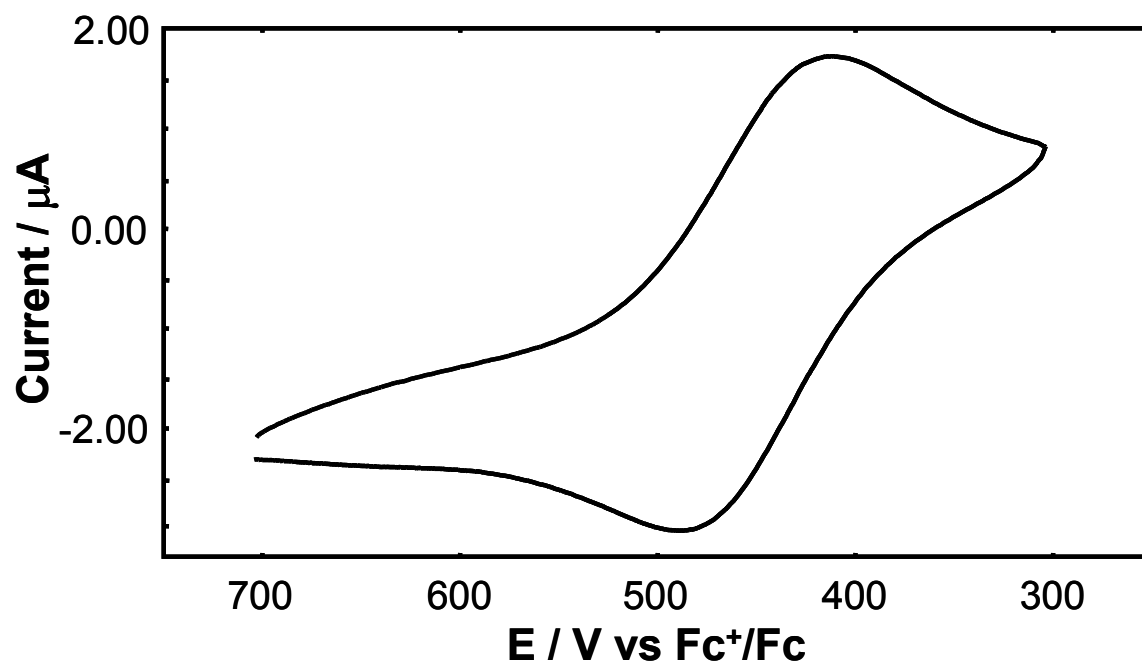

Figure SI-4. Cyclic voltammogram of  $\text{Tp}^*\text{MoO}(\text{OCH}_2\text{CH}_2\text{CH}_2\text{O})$  (**D**). Experimental conditions in methods section.

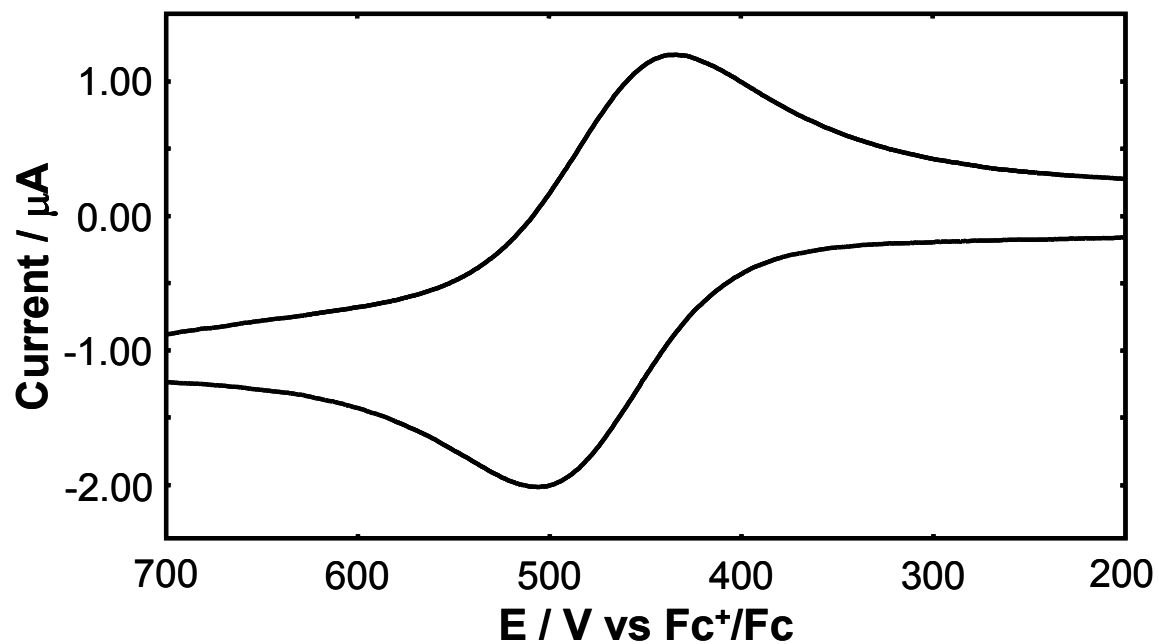

Figure SI-5. Cyclic voltammogram of  $\text{Tp}^*\text{MoO}[\text{OCH}(\text{CH}_3)\text{CH}_2\text{CH}(\text{CH}_3)\text{O}]$  (**E**). Experimental conditions in methods section.

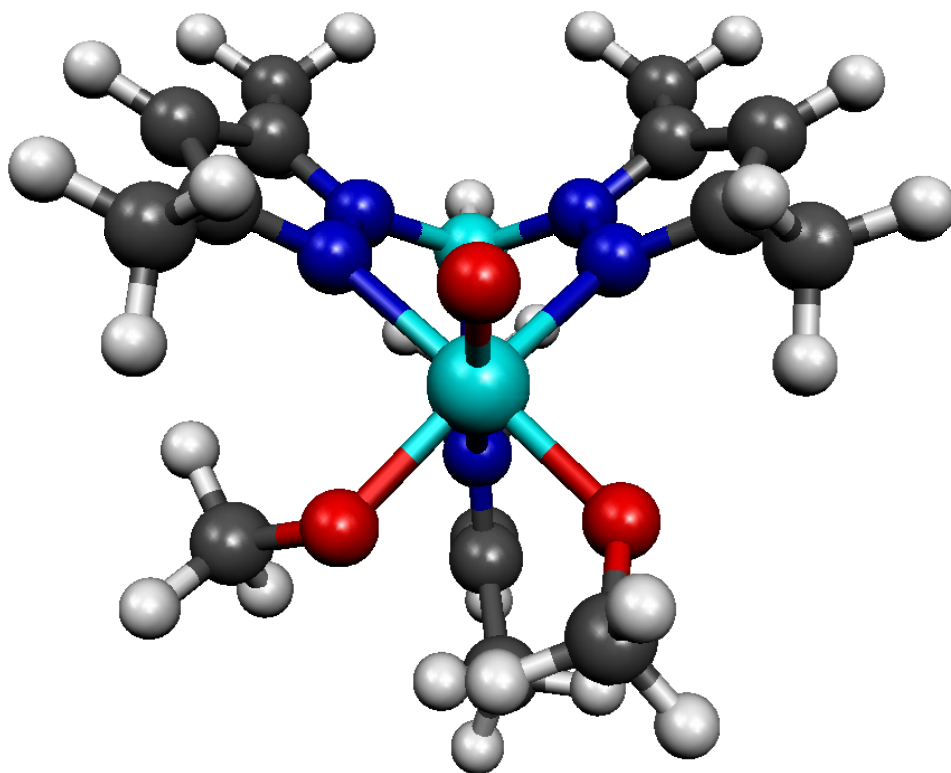

Figure SI-6. Calculated optimized structure for A

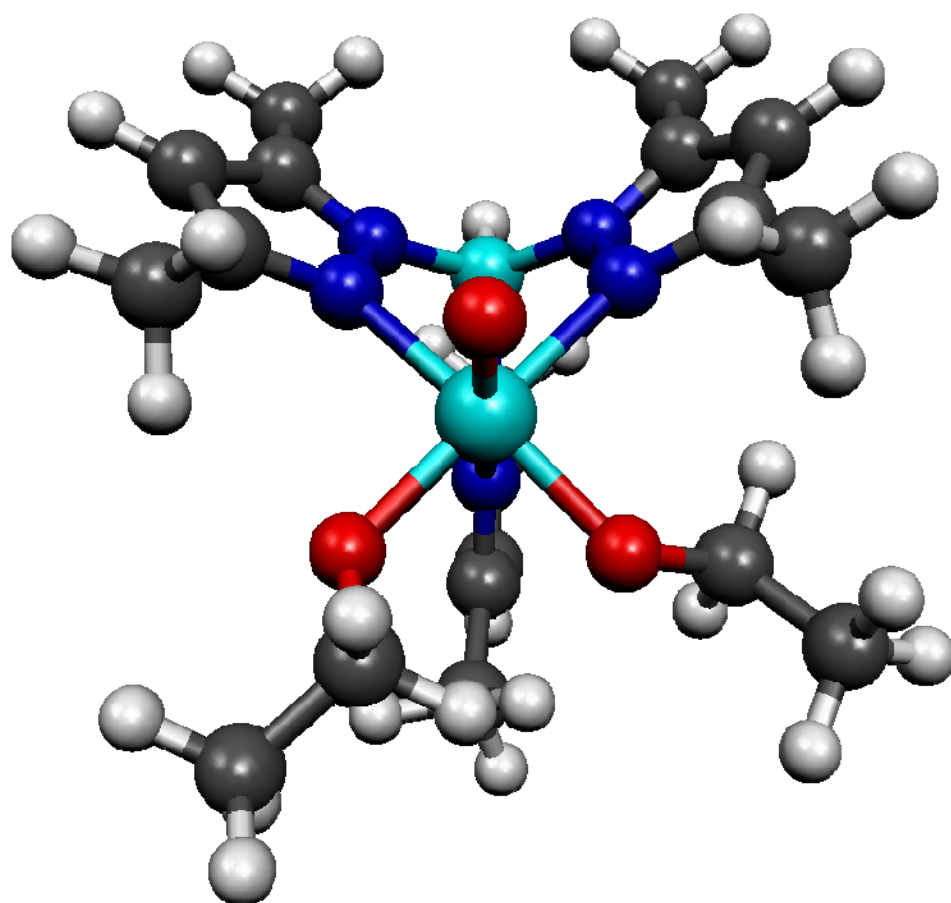

Figure SI-7. Calculated optimized structure for **B**.



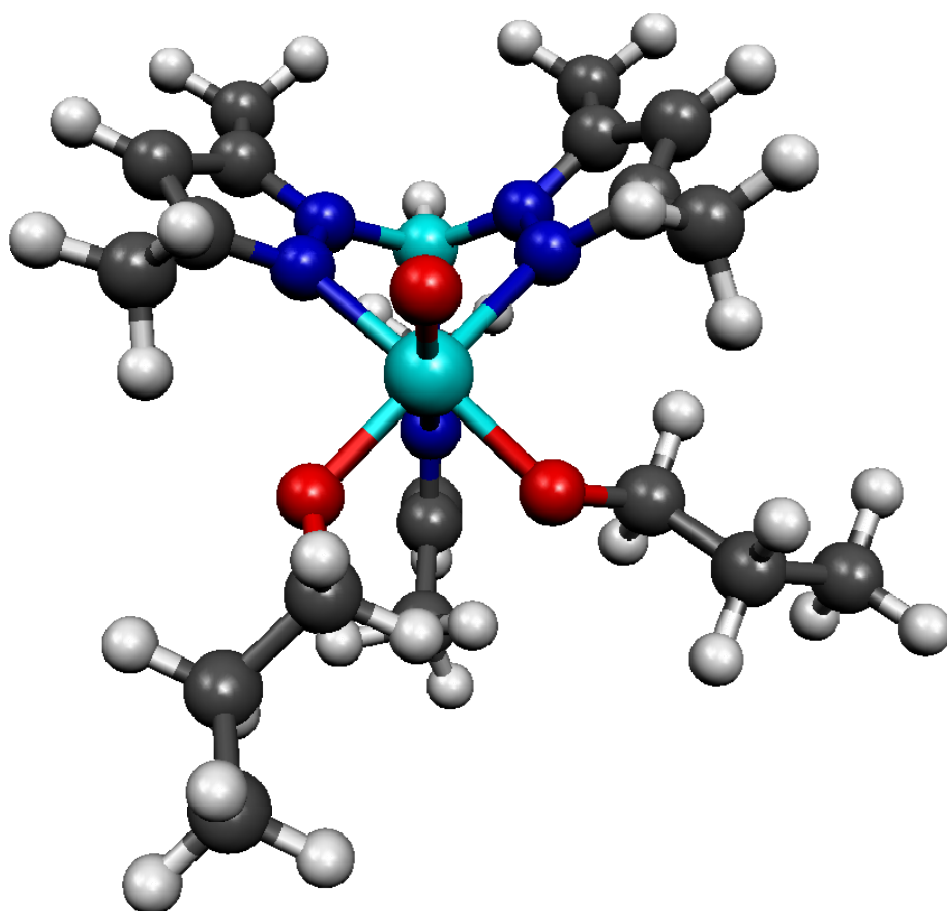

Figure SI-8. Calculated optimized structure for C.

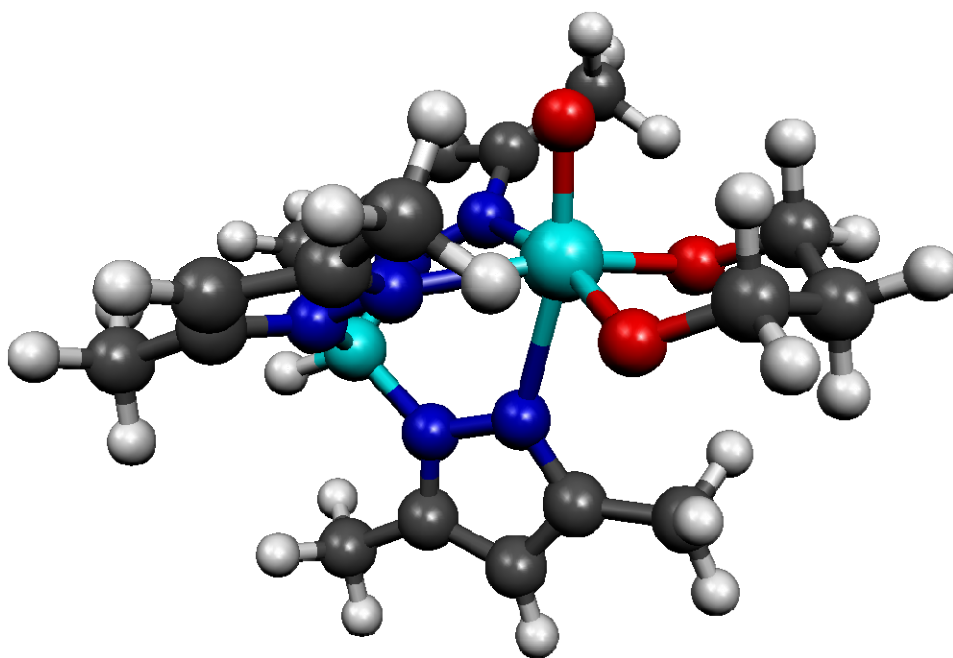

Figure SI-9. Calculated optimized structure of **D** in the chair conformation.

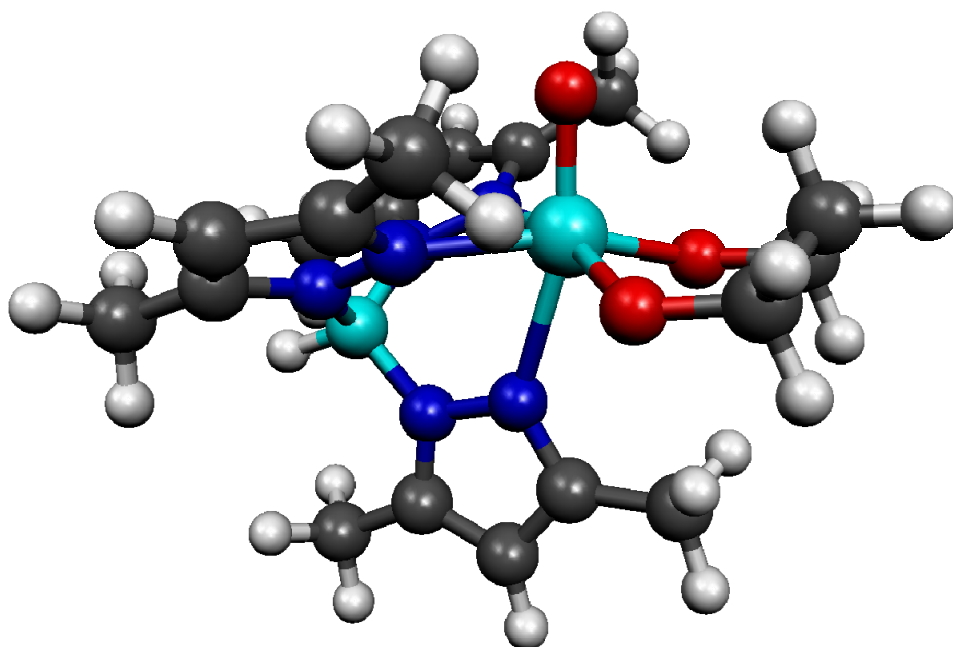

Figure SI-10. Calculated optimized structure of **D** in the boat conformation.

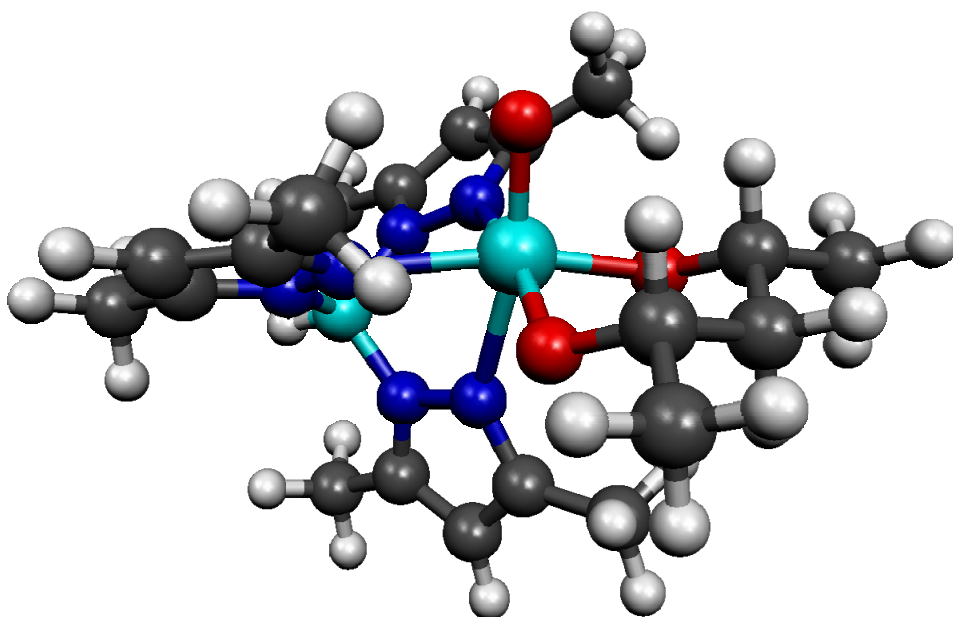

Figure SI-11. Calculated optimized structure of **E** in the chair conformation.

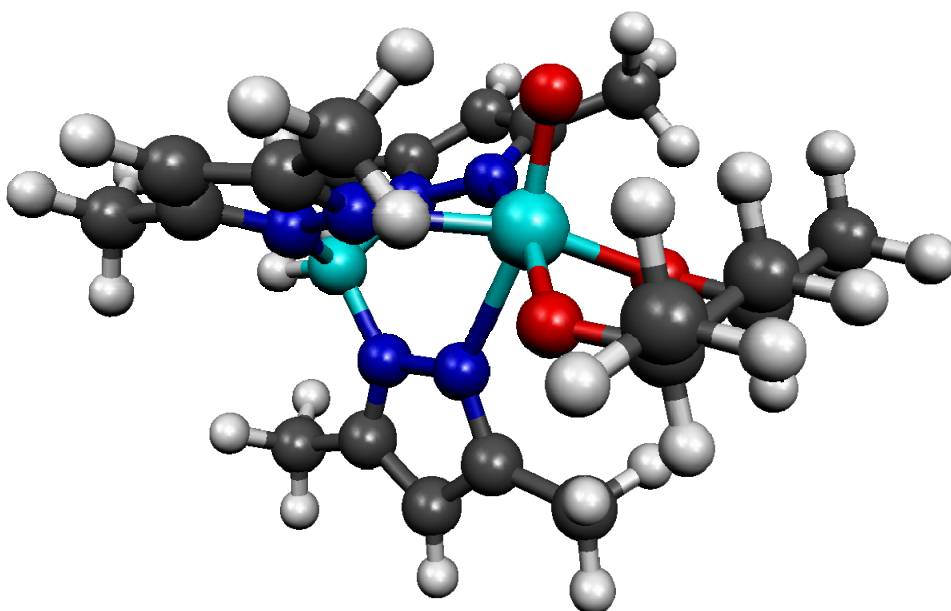

Figure SI-12. Calculated optimized structure of **E** in the boat conformation.

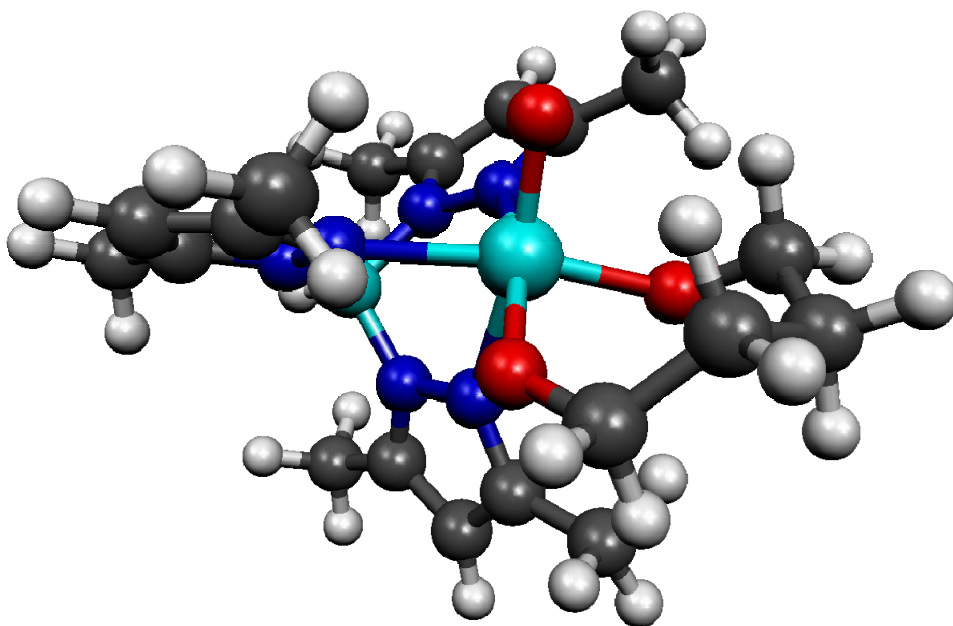

Figure SI-13. Calculated optimized structure for **F** in the boat-twist conformation.

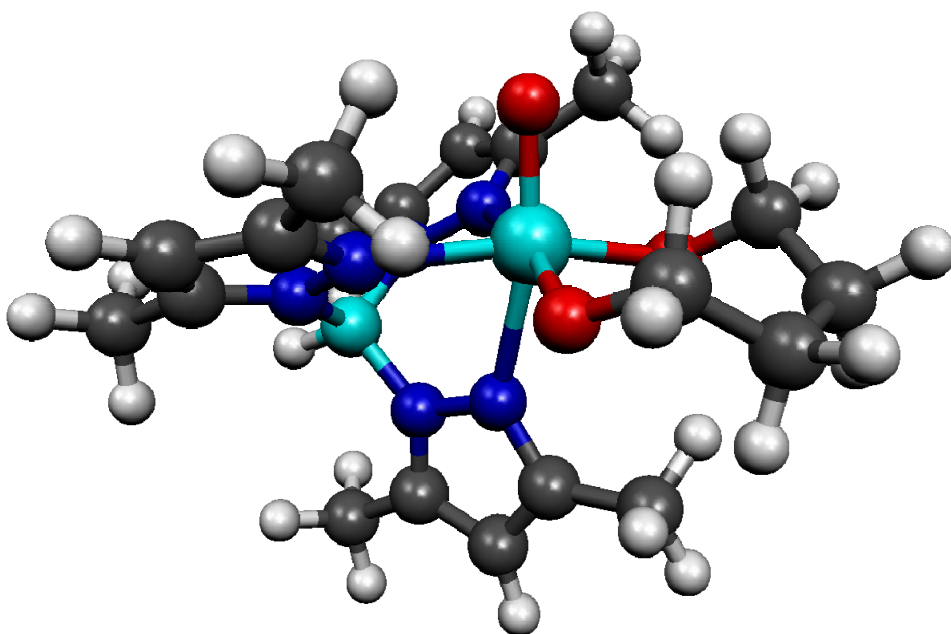

Figure SI-14. Calculated optimized structure of **F** in the chair conformation.

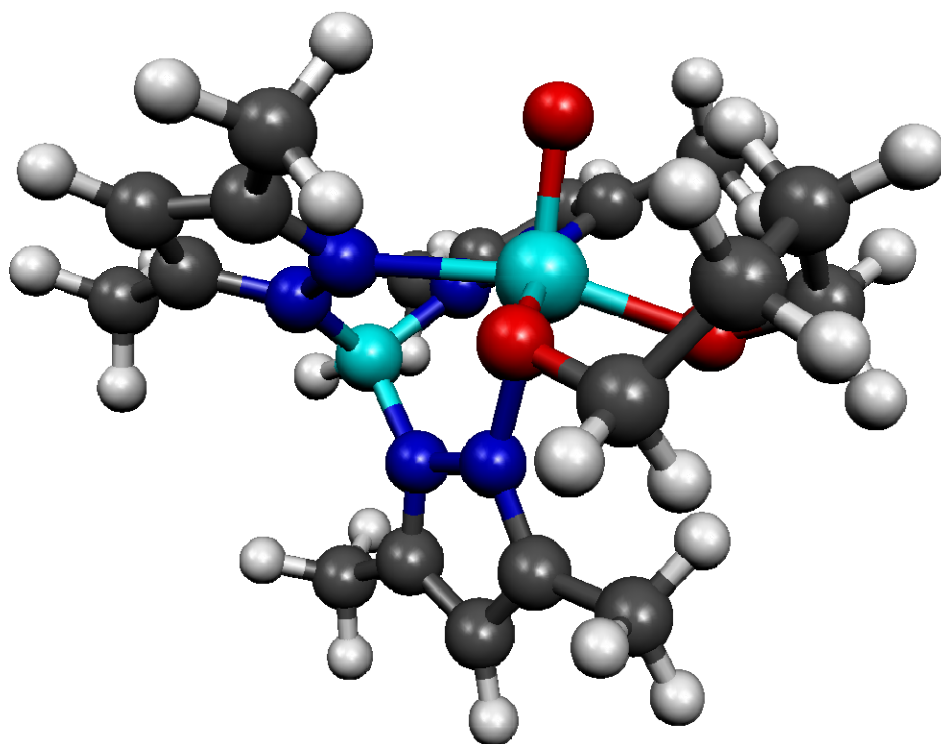

Figure SI-15. Calculated optimized structure of **F** in the boat conformation.



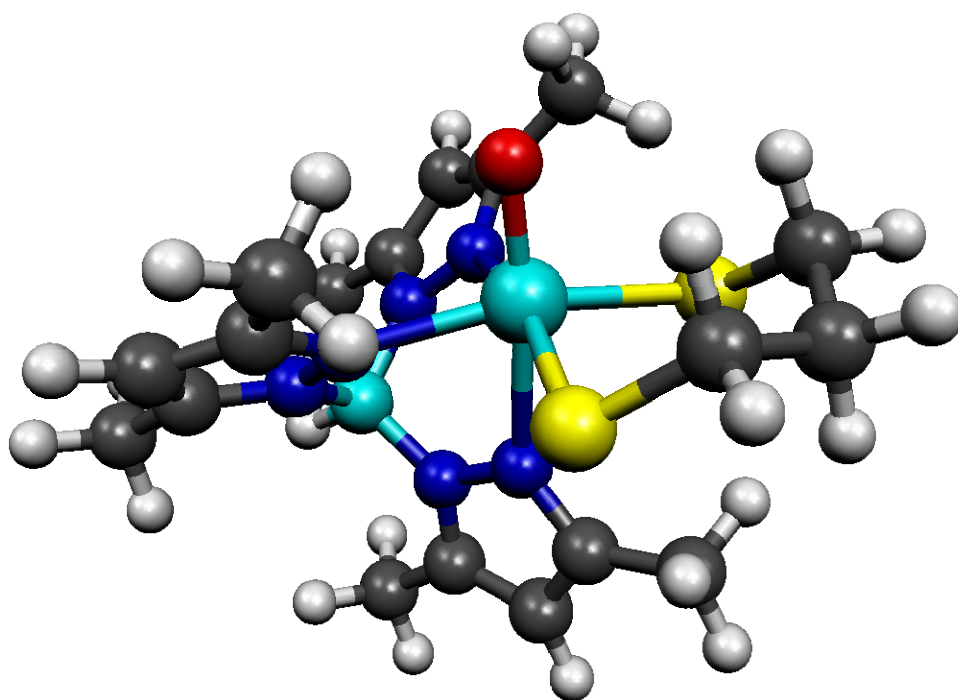

Figure SI-16. Calculated optimized structure of  $\text{Tp}^*\text{MoO}[\text{S}(\text{CH}_2)_3\text{S}]$  in the chair conformation.

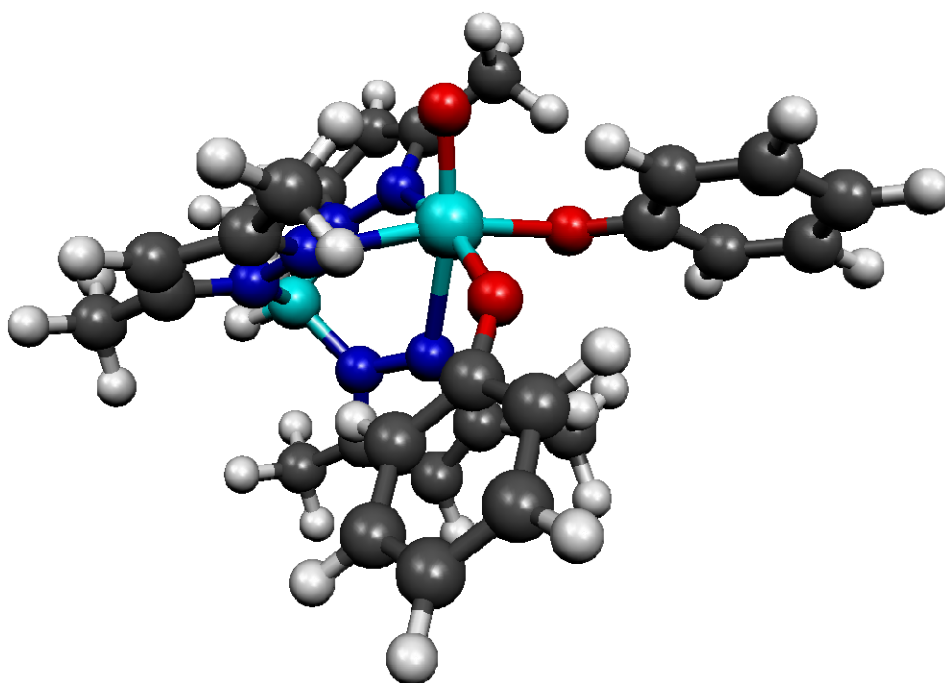

Figure SI-17. Calculated optimized structure of  $\text{Tp}^*\text{MoO}(\text{OC}_6\text{H}_5)_2$ .

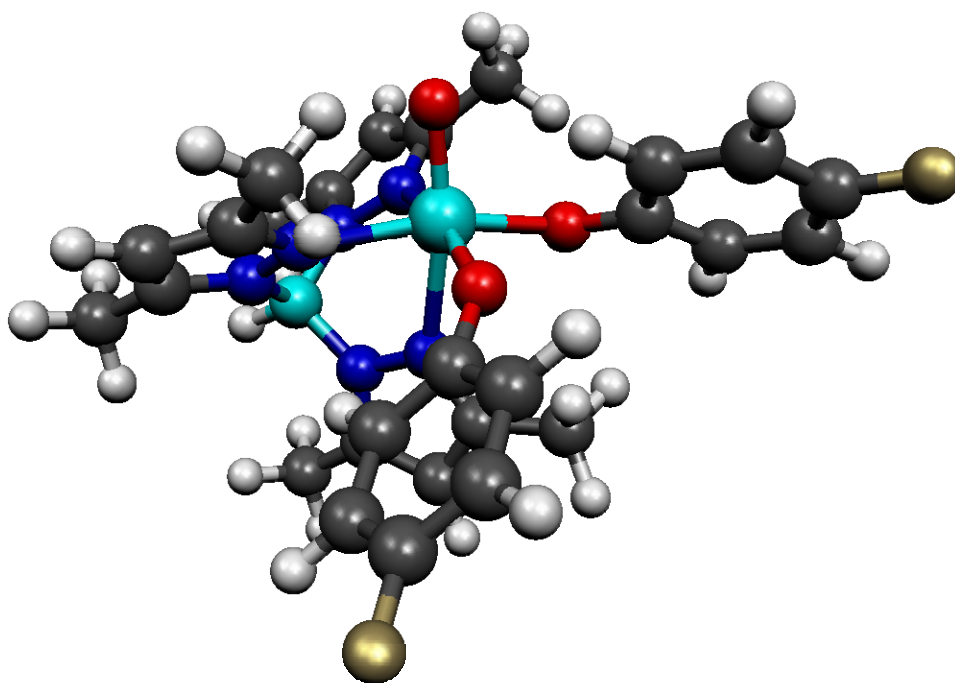

Figure SI-18. Calculated optimized structure of  $\text{Tp}^*\text{MoO}(p\text{-OC}_6\text{H}_4\text{F})_2$ .

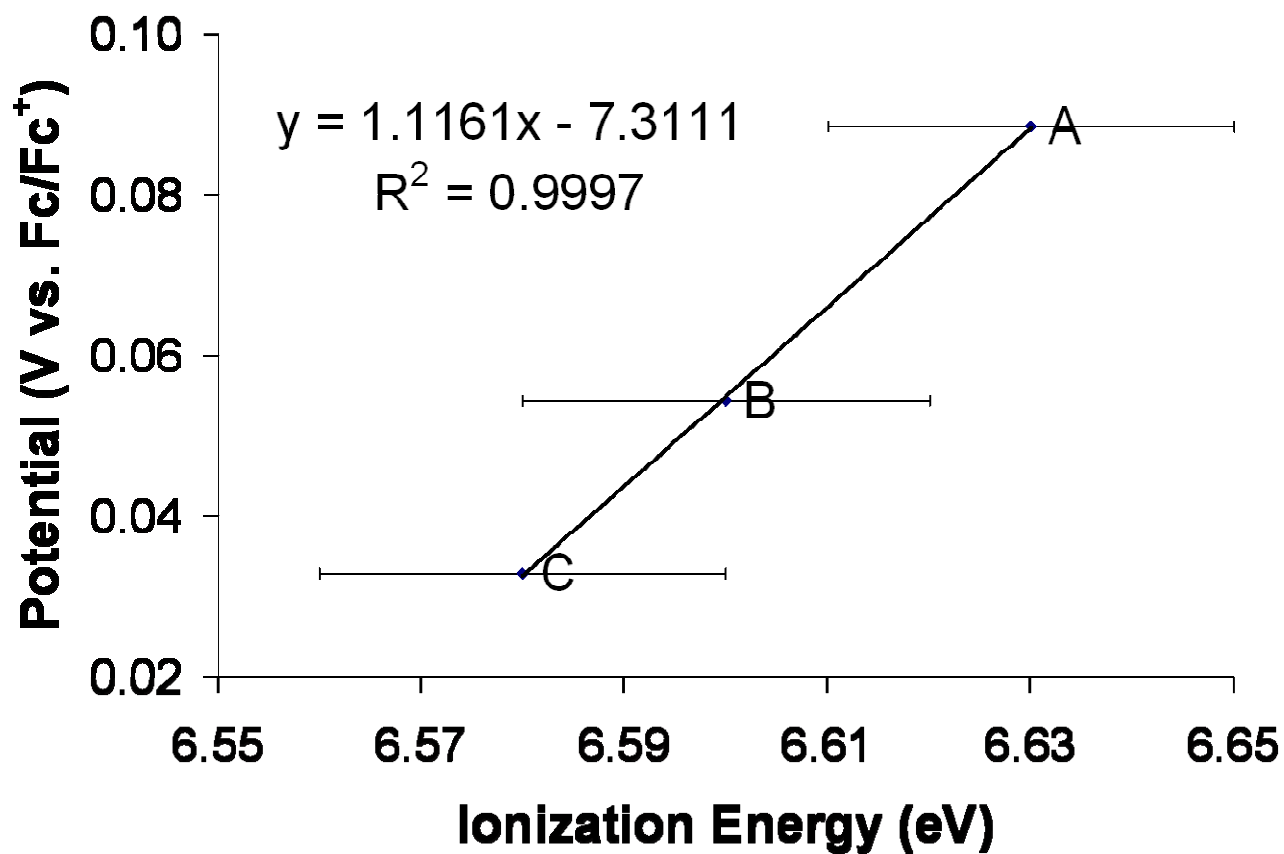

Figure SI-19. Correlation between experimental oxidation potentials (V vs. Fc/Fc<sup>+</sup>) and ionization energies (eV) for alkoxide containing Tp\*MoO(OX)<sub>2</sub> molecules.

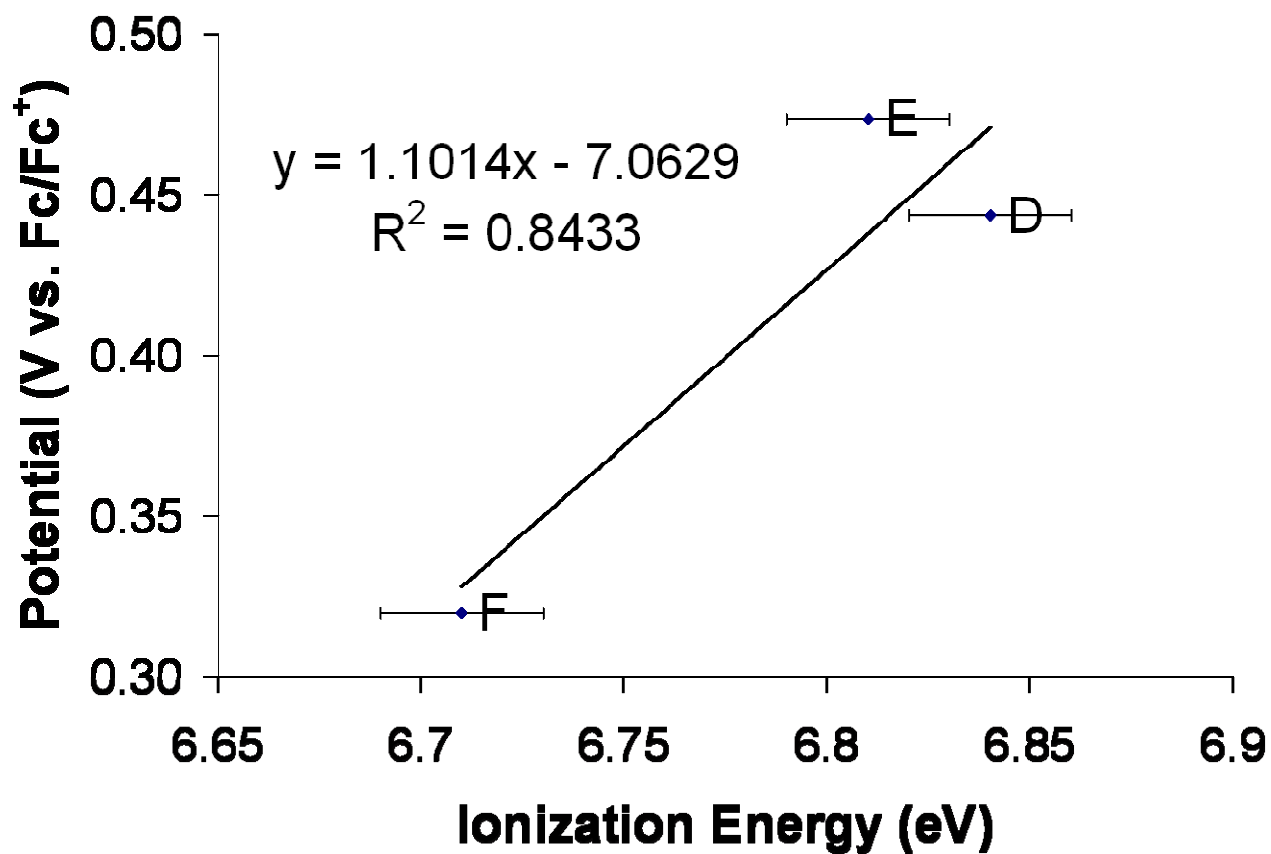

Figure SI-20. Correlation between experimental oxidation potentials (V vs. Fc/Fc<sup>+</sup>) and ionization energies (eV) for diolato containing Tp\*MoO(OX)<sub>2</sub> molecules.

## Calculated geometries of the complexes under study. (Cartesian coordinates in Angstroms)

---

### A – Tp\*MoO(OCH<sub>3</sub>)<sub>2</sub>

|      |           |           |           |
|------|-----------|-----------|-----------|
| 1.Mo | -0.000633 | -0.002586 | -0.006573 |
| 2.O  | 1.733009  | -0.063914 | 0.026677  |
| 3.O  | -0.479885 | 1.903928  | -0.070041 |
| 4.C  | -1.193160 | 2.591555  | -1.059996 |
| 5.H  | -0.956417 | 2.224293  | -2.086056 |
| 6.H  | -0.948518 | 3.676643  | -1.002133 |
| 7.H  | -2.295294 | 2.475712  | -0.919313 |
| 8.O  | -0.473941 | -0.031315 | 1.891410  |
| 9.C  | -0.158021 | 1.055723  | 2.721672  |
| 10.H | -0.355215 | 2.023842  | 2.199305  |
| 11.H | 0.923349  | 1.038591  | 3.001087  |
| 12.H | -0.766735 | 1.011678  | 3.653347  |
| 13.N | -0.013230 | -0.108345 | -2.214080 |
| 14.C | 0.760889  | 0.542486  | -3.104091 |
| 15.C | 0.483202  | 0.049568  | -4.387351 |
| 16.C | -0.484796 | -0.938796 | -4.219995 |
| 17.N | -0.761804 | -1.014753 | -2.896822 |
| 18.N | -0.196379 | -2.158310 | -0.129438 |
| 19.N | -0.879246 | -2.783268 | -1.126427 |
| 20.C | -0.738291 | -4.124300 | -1.000116 |
| 21.C | 0.072004  | -4.359607 | 0.108662  |
| 22.C | 0.395546  | -3.098918 | 0.630136  |
| 23.N | -2.295585 | -0.294886 | -0.424369 |
| 24.C | -3.377731 | 0.233005  | 0.173018  |
| 25.C | -4.534056 | -0.296566 | -0.427285 |
| 26.C | -4.088345 | -1.181135 | -1.404682 |
| 27.N | -2.734271 | -1.153349 | -1.376560 |
| 28.B | -1.696634 | -1.968257 | -2.141362 |
| 29.H | 0.939650  | 0.367522  | -5.333268 |
| 30.H | 0.389098  | -5.336734 | 0.494111  |
| 31.H | -5.577316 | -0.069106 | -0.173513 |
| 32.C | -1.380448 | -5.095270 | -1.923393 |
| 33.H | -1.058548 | -4.940039 | -2.974914 |
| 34.H | -1.107573 | -6.126288 | -1.627190 |
| 35.H | -2.487870 | -5.011047 | -1.903924 |
| 36.C | 1.244775  | -2.721947 | 1.784392  |
| 37.H | 0.709643  | -1.982571 | 2.419486  |
| 38.H | 1.517777  | -3.612692 | 2.380868  |
| 39.H | 2.171095  | -2.218576 | 1.430347  |
| 40.C | -3.266416 | 1.174489  | 1.315429  |
| 41.H | -4.211480 | 1.734759  | 1.453322  |
| 42.H | -3.039224 | 0.617669  | 2.250314  |
| 43.H | -2.423033 | 1.881433  | 1.165107  |
| 44.C | -4.860613 | -2.040421 | -2.340008 |
| 45.H | -4.647527 | -3.118866 | -2.178459 |
| 46.H | -5.945190 | -1.879107 | -2.188111 |
| 47.H | -4.623238 | -1.815364 | -3.401469 |
| 48.C | 1.743822  | 1.563083  | -2.666578 |
| 49.H | 2.266809  | 1.999931  | -3.538103 |
| 50.H | 1.251980  | 2.376876  | -2.091825 |
| 51.H | 2.484394  | 1.104320  | -1.975953 |
| 52.C | -1.144032 | -1.801175 | -5.235052 |
| 53.H | -0.943420 | -2.878280 | -5.052419 |
| 54.H | -2.246710 | -1.670016 | -5.233781 |
| 55.H | -0.766393 | -1.546311 | -6.243800 |
| 56.H | -2.238356 | -2.717755 | -2.927649 |

---

---

 $A^+ - Tp^*MoO(OCH_3)_2^+$ 

|      |           |           |           |
|------|-----------|-----------|-----------|
| 1.Mo | -0.105813 | 0.036623  | 0.019428  |
| 2.O  | 1.608182  | 0.099639  | 0.233906  |
| 3.O  | -0.474318 | 1.842015  | -0.434752 |
| 4.C  | -1.283248 | 2.467068  | -1.394443 |
| 5.H  | -0.959409 | 2.159738  | -2.416895 |
| 6.H  | -1.168732 | 3.566154  | -1.288222 |
| 7.H  | -2.350198 | 2.177434  | -1.264180 |
| 8.O  | -0.569420 | 0.031925  | 1.854477  |
| 9.C  | 0.201951  | 0.344760  | 2.990962  |
| 10.H | -0.080716 | 1.359063  | 3.349847  |
| 11.H | 1.287920  | 0.335667  | 2.740158  |
| 12.H | -0.014005 | -0.383600 | 3.800780  |
| 13.N | 0.032618  | -0.206326 | -2.160478 |
| 14.C | 0.842493  | 0.436889  | -3.036790 |
| 15.C | 0.527028  | -0.000656 | -4.326257 |
| 16.C | -0.496551 | -0.938538 | -4.186854 |
| 17.N | -0.775240 | -1.041066 | -2.866259 |
| 18.N | -0.157867 | -2.088456 | -0.160042 |
| 19.N | -0.890537 | -2.752722 | -1.095607 |
| 20.C | -0.669145 | -4.080013 | -0.980090 |
| 21.C | 0.238799  | -4.268042 | 0.063895  |
| 22.C | 0.548743  | -3.002792 | 0.557073  |
| 23.N | -2.319514 | -0.279339 | -0.408998 |
| 24.C | -3.403089 | 0.313882  | 0.143714  |
| 25.C | -4.553443 | -0.194215 | -0.470312 |
| 26.C | -4.116369 | -1.124793 | -1.412687 |
| 27.N | -2.764054 | -1.150690 | -1.350780 |
| 28.B | -1.733736 | -1.974051 | -2.116607 |
| 29.H | 1.001043  | 0.318049  | -5.263181 |
| 30.H | 0.629547  | -5.225676 | 0.429883  |
| 31.H | -5.594102 | 0.075490  | -0.250029 |
| 32.C | -1.320261 | -5.087831 | -1.850925 |
| 33.H | -1.045660 | -4.944533 | -2.916995 |
| 34.H | -1.005421 | -6.103737 | -1.546991 |
| 35.H | -2.426705 | -5.032276 | -1.783442 |
| 36.C | 1.454960  | -2.633436 | 1.666593  |
| 37.H | 0.885462  | -2.226692 | 2.529770  |
| 38.H | 2.012101  | -3.523509 | 2.012824  |
| 39.H | 2.179895  | -1.853527 | 1.348928  |
| 40.C | -3.291163 | 1.300399  | 1.246980  |
| 41.H | -4.233446 | 1.870015  | 1.352690  |
| 42.H | -3.082663 | 0.788660  | 2.210340  |
| 43.H | -2.456468 | 2.012637  | 1.077842  |
| 44.C | -4.900057 | -1.972241 | -2.345384 |
| 45.H | -4.736031 | -3.053145 | -2.151304 |
| 46.H | -5.979856 | -1.763797 | -2.226592 |
| 47.H | -4.626574 | -1.781837 | -3.404353 |
| 48.C | 1.880398  | 1.397578  | -2.593651 |
| 49.H | 2.430276  | 1.798253  | -3.465030 |
| 50.H | 1.440446  | 2.246543  | -2.027182 |
| 51.H | 2.604698  | 0.907078  | -1.908294 |
| 52.C | -1.204025 | -1.728701 | -5.224452 |
| 53.H | -1.046672 | -2.819033 | -5.085751 |
| 54.H | -2.298985 | -1.547913 | -5.203101 |
| 55.H | -0.828566 | -1.453027 | -6.227697 |
| 56.H | -2.273422 | -2.735975 | -2.885634 |

---

---

**B – Tp\*MoO(OCH<sub>2</sub>CH<sub>3</sub>)<sub>2</sub>**

|      |           |           |           |
|------|-----------|-----------|-----------|
| 1.Mo | -2.937612 | -1.502465 | 3.241754  |
| 2.N  | -2.816631 | 0.040222  | 1.722071  |
| 3.C  | -3.818899 | 0.720520  | 1.134712  |
| 4.C  | -3.262151 | 1.695039  | 0.294506  |
| 5.C  | -1.879946 | 1.564199  | 0.411388  |
| 6.N  | -1.637220 | 0.559346  | 1.286245  |
| 7.N  | -1.247165 | -2.304147 | 1.826321  |
| 8.N  | -0.245070 | -1.496740 | 1.401763  |
| 9.C  | 0.624544  | -2.187159 | 0.625469  |
| 10.C | 0.153601  | -3.494398 | 0.549444  |
| 11.C | -1.029167 | -3.525653 | 1.309621  |
| 12.N | -1.166667 | -0.478797 | 4.089847  |
| 13.N | -0.228347 | 0.115377  | 3.305200  |
| 14.C | 0.637387  | 0.818861  | 4.072147  |
| 15.C | 0.235104  | 0.670657  | 5.398010  |
| 16.C | -0.905433 | -0.144509 | 5.368691  |
| 17.B | -0.301879 | -0.019991 | 1.778798  |
| 18.C | -1.975340 | -4.649833 | 1.520566  |
| 19.C | 1.831719  | -1.570084 | 0.016119  |
| 20.C | -5.234829 | 0.402855  | 1.433981  |
| 21.C | -0.798792 | 2.328933  | -0.262260 |
| 22.C | -1.781449 | -0.596213 | 6.476617  |
| 23.C | 1.773821  | 1.591930  | 3.506816  |
| 24.O | -2.531144 | -3.138007 | 4.248780  |
| 25.O | -4.195310 | -2.517273 | 2.140634  |
| 26.C | -1.292234 | -3.596889 | 4.732644  |
| 27.C | -1.513357 | -4.506219 | 5.920722  |
| 28.C | -5.057490 | -3.456947 | 2.741051  |
| 29.C | -5.837041 | -4.201075 | 1.682182  |
| 30.O | -4.007188 | -0.573402 | 4.245210  |
| 31.H | 2.518997  | -1.159989 | 0.786544  |
| 32.H | 2.385661  | -2.329472 | -0.568644 |
| 33.H | 1.568151  | -0.734016 | -0.666209 |
| 34.H | 0.612025  | -4.326773 | 0.000247  |
| 35.H | 0.619531  | 0.584443  | 1.269917  |
| 36.H | -5.915178 | 0.984974  | 0.784526  |
| 37.H | -5.460293 | 0.626041  | 2.499867  |
| 38.H | -5.412234 | -0.686720 | 1.299998  |
| 39.H | -3.802553 | 2.416305  | -0.331315 |
| 40.H | -1.242845 | 3.116167  | -0.901263 |
| 41.H | -0.171485 | 1.675030  | -0.904749 |
| 42.H | -0.120668 | 2.817131  | 0.469299  |
| 43.H | 2.457442  | 0.948560  | 2.913904  |
| 44.H | 1.422805  | 2.402682  | 2.833108  |
| 45.H | 2.356020  | 2.054351  | 4.326779  |
| 46.H | 0.712186  | 1.112189  | 6.282083  |
| 47.H | -1.425205 | -0.194196 | 7.443719  |
| 48.H | -1.814463 | -1.705770 | 6.539416  |
| 49.H | -2.826479 | -0.264383 | 6.292597  |
| 50.H | -2.023682 | -3.960388 | 6.743333  |
| 51.H | -0.545044 | -4.894224 | 6.302164  |
| 52.H | -0.753498 | -4.147143 | 3.920635  |
| 53.H | -0.634322 | -2.737609 | 5.007697  |
| 54.H | -1.482827 | -5.620040 | 1.315347  |
| 55.H | -2.377509 | -4.635931 | 2.556542  |
| 56.H | -2.853165 | -4.544509 | 0.845946  |
| 57.H | -4.453165 | -4.156633 | 3.372693  |
| 58.H | -6.533415 | -4.932829 | 2.144645  |
| 59.H | -5.148440 | -4.750383 | 1.004840  |
| 60.H | -6.430374 | -3.493192 | 1.065562  |
| 61.H | -5.750691 | -2.926458 | 3.443091  |
| 62.H | -2.153263 | -5.368492 | 5.637894  |

---



---

 $B^+ - Tp^*MoO(OCH_2CH_3)_2^+$ 

|      |           |           |           |
|------|-----------|-----------|-----------|
| 1.Mo | -2.903479 | -1.602547 | 3.222202  |
| 2.N  | -2.818586 | -0.017313 | 1.800564  |
| 3.C  | -3.863750 | 0.671770  | 1.269720  |
| 4.C  | -3.347188 | 1.639710  | 0.410998  |
| 5.C  | -1.957358 | 1.511623  | 0.452910  |
| 6.N  | -1.664679 | 0.502525  | 1.302101  |
| 7.N  | -1.223033 | -2.346615 | 1.871389  |
| 8.N  | -0.247505 | -1.528098 | 1.400170  |
| 9.C  | 0.619785  | -2.227055 | 0.629896  |
| 10.C | 0.178768  | -3.549651 | 0.610623  |
| 11.C | -0.980714 | -3.588623 | 1.393877  |
| 12.N | -1.263336 | -0.388249 | 4.045746  |
| 13.N | -0.253632 | 0.113918  | 3.287624  |
| 14.C | 0.625271  | 0.775240  | 4.076331  |
| 15.C | 0.156920  | 0.687984  | 5.387607  |
| 16.C | -1.032739 | -0.044141 | 5.336098  |
| 17.B | -0.306281 | -0.047532 | 1.764456  |
| 18.C | -1.879952 | -4.736158 | 1.673452  |
| 19.C | 1.795126  | -1.607856 | -0.031660 |
| 20.C | -5.273785 | 0.359611  | 1.587687  |
| 21.C | -0.919746 | 2.289215  | -0.265998 |
| 22.C | -1.964088 | -0.408154 | 6.430203  |
| 23.C | 1.837953  | 1.446675  | 3.547041  |
| 24.O | -2.256803 | -2.902046 | 4.439232  |
| 25.O | -4.046756 | -2.662403 | 2.148524  |
| 26.C | -0.981599 | -3.393596 | 4.802760  |
| 27.C | -1.120617 | -4.424356 | 5.894656  |
| 28.C | -5.351950 | -3.129725 | 2.480659  |
| 29.C | -6.127864 | -3.471465 | 1.238603  |
| 30.O | -4.125914 | -0.853414 | 4.188110  |
| 31.H | 2.482530  | -1.139253 | 0.703501  |
| 32.H | 2.361482  | -2.377026 | -0.589535 |
| 33.H | 1.491203  | -0.817398 | -0.749838 |
| 34.H | 0.645919  | -4.388144 | 0.078718  |
| 35.H | 0.596370  | 0.563887  | 1.240278  |
| 36.H | -5.944394 | 1.102454  | 1.118028  |
| 37.H | -5.446225 | 0.356594  | 2.685599  |
| 38.H | -5.549341 | -0.649685 | 1.209103  |
| 39.H | -3.922515 | 2.359105  | -0.184972 |
| 40.H | -1.400760 | 3.046199  | -0.913421 |
| 41.H | -0.289456 | 1.635947  | -0.904803 |
| 42.H | -0.242749 | 2.815610  | 0.438932  |
| 43.H | 2.497755  | 0.736589  | 3.006219  |
| 44.H | 1.577849  | 2.260997  | 2.838490  |
| 45.H | 2.416159  | 1.888732  | 4.379985  |
| 46.H | 0.623596  | 1.121957  | 6.280908  |
| 47.H | -1.611109 | 0.011021  | 7.390367  |
| 48.H | -2.061031 | -1.510796 | 6.536549  |
| 49.H | -2.985985 | -0.023302 | 6.224355  |
| 50.H | -1.605096 | -3.993513 | 6.795392  |
| 51.H | -0.115488 | -4.793936 | 6.184486  |
| 52.H | -0.482034 | -3.806216 | 3.895134  |
| 53.H | -0.370083 | -2.519785 | 5.137079  |
| 54.H | -1.370815 | -5.691096 | 1.444457  |
| 55.H | -2.212261 | -4.749155 | 2.733178  |
| 56.H | -2.799801 | -4.670596 | 1.053967  |
| 57.H | -5.221807 | -4.027157 | 3.130721  |
| 58.H | -7.129934 | -3.860349 | 1.516410  |
| 59.H | -5.606352 | -4.250541 | 0.645378  |
| 60.H | -6.270497 | -2.579152 | 0.593224  |
| 61.H | -5.855416 | -2.346738 | 3.099260  |
| 62.H | -1.722873 | -5.291059 | 5.552432  |

---

---

C – Tp\*MoO(OCH<sub>2</sub>CH<sub>2</sub>CH<sub>3</sub>)<sub>2</sub>

|      |           |           |           |
|------|-----------|-----------|-----------|
| 1.Mo | -0.001288 | 0.001172  | 0.011123  |
| 2.N  | 2.167471  | 0.002324  | 0.008399  |
| 3.C  | 3.006158  | 1.055255  | -0.003894 |
| 4.C  | 4.320122  | 0.578017  | 0.102606  |
| 5.C  | 4.223548  | -0.809679 | 0.181355  |
| 6.N  | 2.909115  | -1.131369 | 0.129342  |
| 7.N  | 0.510243  | -1.753749 | -1.463055 |
| 8.N  | 1.451568  | -2.678762 | -1.155721 |
| 9.C  | 1.572182  | -3.584586 | -2.155845 |
| 10.C | 0.665716  | -3.220466 | -3.146697 |
| 11.C | 0.023874  | -2.060215 | -2.677978 |
| 12.N | 0.234012  | -1.681544 | 1.429095  |
| 13.N | 1.252655  | -2.576917 | 1.328074  |
| 14.C | 1.251537  | -3.400954 | 2.402222  |
| 15.C | 0.194738  | -3.013816 | 3.223634  |
| 16.C | -0.416445 | -1.926319 | 2.583385  |
| 17.B | 2.227943  | -2.508791 | 0.145680  |
| 18.C | -0.988266 | -1.213906 | -3.357705 |
| 19.C | 2.528554  | -4.721388 | -2.107248 |
| 20.C | 2.489806  | 2.440923  | -0.097267 |
| 21.C | 5.301293  | -1.826405 | 0.291484  |
| 22.C | -1.559742 | -1.087246 | 3.016940  |
| 23.C | 2.246657  | -4.489027 | 2.587750  |
| 24.O | -1.847956 | -0.527280 | -0.389468 |
| 25.O | -0.017839 | 1.167475  | -1.558333 |
| 26.C | -2.454411 | -1.789136 | -0.287762 |
| 27.C | -3.949139 | -1.645643 | -0.084143 |
| 28.C | -1.149217 | 1.944252  | -1.864809 |
| 29.C | -0.981799 | 2.641696  | -3.197749 |
| 30.O | -0.100373 | 1.141135  | 1.316323  |
| 31.H | 2.330202  | -5.392031 | -1.244160 |
| 32.H | 2.445048  | -5.320673 | -3.034249 |
| 33.H | 3.579272  | -4.372231 | -2.016067 |
| 34.H | 0.495433  | -3.733362 | -4.101962 |
| 35.H | 3.066785  | -3.378867 | 0.257380  |
| 36.H | 3.318814  | 3.163340  | -0.217228 |
| 37.H | 1.907603  | 2.695593  | 0.815316  |
| 38.H | 1.781771  | 2.520890  | -0.951068 |
| 39.H | 5.241346  | 1.173816  | 0.119073  |
| 40.H | 6.285133  | -1.321490 | 0.339637  |
| 41.H | 5.307886  | -2.514318 | -0.580670 |
| 42.H | 5.187523  | -2.452377 | 1.201707  |
| 43.H | 2.223572  | -5.216703 | 1.749303  |
| 44.H | 3.282592  | -4.092405 | 2.646976  |
| 45.H | 2.032584  | -5.035011 | 3.526479  |
| 46.H | -0.091657 | -3.465823 | 4.181670  |
| 47.H | -1.909543 | -1.395005 | 4.020345  |
| 48.H | -2.410395 | -1.161130 | 2.304097  |
| 49.H | -1.259387 | -0.017061 | 3.034362  |
| 50.H | -4.126488 | -1.045143 | 0.837537  |
| 51.H | -2.259874 | -2.383168 | -1.218719 |
| 52.H | -2.008620 | -2.383618 | 0.548552  |
| 53.H | -1.506795 | -1.784678 | -4.152280 |
| 54.H | -1.725825 | -0.818909 | -2.626455 |
| 55.H | -0.500773 | -0.325793 | -3.816712 |
| 56.H | -2.061683 | 1.291788  | -1.868853 |
| 57.H | -0.815447 | 1.868836  | -3.982764 |
| 58.H | -0.053211 | 3.254931  | -3.161932 |
| 59.H | -1.318055 | 2.703076  | -1.055372 |
| 60.H | -4.366034 | -1.049756 | -0.926937 |
| 61.C | -2.185227 | 3.505094  | -3.538412 |
| 62.H | -2.351655 | 4.283567  | -2.761641 |
| 63.H | -2.061623 | 4.022986  | -4.511299 |
| 64.H | -3.113309 | 2.894971  | -3.596482 |
| 65.C | -4.632447 | -2.999369 | 0.013612  |
| 66.H | -5.727485 | -2.900519 | 0.158626  |
| 67.H | -4.467077 | -3.598460 | -0.908636 |
| 68.H | -4.230777 | -3.590452 | 0.865910  |

---

---

 $C^+ - Tp^*MoO(OCH_2CH_2CH_3)_2^+$ 

|      |           |           |           |
|------|-----------|-----------|-----------|
| 1.Mo | -0.046807 | -0.037426 | -0.059552 |
| 2.N  | 2.074549  | -0.005664 | 0.026157  |
| 3.C  | 2.872617  | 1.095797  | 0.048338  |
| 4.C  | 4.194230  | 0.663107  | 0.128800  |
| 5.C  | 4.157592  | -0.733283 | 0.161218  |
| 6.N  | 2.862172  | -1.111237 | 0.098268  |
| 7.N  | 0.448091  | -1.786772 | -1.448634 |
| 8.N  | 1.425062  | -2.687126 | -1.167831 |
| 9.C  | 1.532941  | -3.591303 | -2.170725 |
| 10.C | 0.580894  | -3.254597 | -3.131297 |
| 11.C | -0.075446 | -2.114628 | -2.650977 |
| 12.N | 0.320795  | -1.591218 | 1.452755  |
| 13.N | 1.273251  | -2.551451 | 1.321482  |
| 14.C | 1.239464  | -3.378670 | 2.391792  |
| 15.C | 0.224725  | -2.927420 | 3.236146  |
| 16.C | -0.330954 | -1.801033 | 2.622684  |
| 17.B | 2.223219  | -2.510137 | 0.120102  |
| 18.C | -1.137335 | -1.309075 | -3.305308 |
| 19.C | 2.519039  | -4.700464 | -2.158328 |
| 20.C | 2.332220  | 2.469836  | -0.033831 |
| 21.C | 5.277570  | -1.701067 | 0.242179  |
| 22.C | -1.416745 | -0.910517 | 3.097419  |
| 23.C | 2.163275  | -4.528703 | 2.551865  |
| 24.O | -1.802049 | -0.741984 | -0.063225 |
| 25.O | -0.094444 | 0.972158  | -1.662791 |
| 26.C | -2.398478 | -2.017617 | -0.098988 |
| 27.C | -3.904346 | -1.897127 | -0.016840 |
| 28.C | -0.955129 | 2.087981  | -1.869719 |
| 29.C | -0.631582 | 2.789858  | -3.163914 |
| 30.O | -0.258163 | 1.248591  | 1.076660  |
| 31.H | 2.382168  | -5.364411 | -1.279118 |
| 32.H | 2.406993  | -5.313495 | -3.072281 |
| 33.H | 3.562043  | -4.320729 | -2.126258 |
| 34.H | 0.393022  | -3.776438 | -4.078183 |
| 35.H | 3.077620  | -3.360355 | 0.222763  |
| 36.H | 3.150651  | 3.209035  | 0.040700  |
| 37.H | 1.595487  | 2.658526  | 0.776858  |
| 38.H | 1.799284  | 2.623497  | -0.998847 |
| 39.H | 5.089594  | 1.296617  | 0.155393  |
| 40.H | 6.240353  | -1.157863 | 0.279907  |
| 41.H | 5.295315  | -2.378155 | -0.637355 |
| 42.H | 5.202095  | -2.337776 | 1.148272  |
| 43.H | 2.085562  | -5.238999 | 1.702492  |
| 44.H | 3.221514  | -4.197671 | 2.609793  |
| 45.H | 1.923951  | -5.076120 | 3.482765  |
| 46.H | -0.068309 | -3.362512 | 4.199974  |
| 47.H | -1.730438 | -1.200257 | 4.117219  |
| 48.H | -2.305498 | -0.952360 | 2.430055  |
| 49.H | -1.083156 | 0.149160  | 3.110453  |
| 50.H | -4.173138 | -1.345664 | 0.911981  |
| 51.H | -2.077224 | -2.553462 | -1.024788 |
| 52.H | -1.995951 | -2.605565 | 0.764809  |
| 53.H | -1.641524 | -1.900256 | -4.092901 |
| 54.H | -1.898061 | -0.956823 | -2.577099 |
| 55.H | -0.702292 | -0.400062 | -3.774131 |
| 56.H | -2.007756 | 1.707693  | -1.883021 |
| 57.H | -0.664138 | 2.044859  | -3.990488 |
| 58.H | 0.413283  | 3.171203  | -3.120885 |
| 59.H | -0.873605 | 2.775628  | -0.990192 |
| 60.H | -4.262395 | -1.276993 | -0.868606 |
| 61.C | -1.613681 | 3.922499  | -3.422380 |
| 62.H | -1.586405 | 4.678988  | -2.608916 |
| 63.H | -1.385377 | 4.444837  | -4.372068 |
| 64.H | -2.656421 | 3.543654  | -3.491253 |
| 65.C | -4.557806 | -3.269122 | -0.038465 |
| 66.H | -5.661161 | -3.187684 | 0.017800  |
| 67.H | -4.309546 | -3.820891 | -0.970382 |
| 68.H | -4.222611 | -3.890884 | 0.819283  |

---

---

**D – Tp\*MoO(OCH<sub>2</sub>CH<sub>2</sub>CH<sub>2</sub>O) in chair conformation**

|       |           |           |           |
|-------|-----------|-----------|-----------|
| 1.B   | 0.001199  | 0.021144  | -0.003487 |
| 2.N   | 1.528292  | 0.031906  | 0.001550  |
| 3.N   | 2.175725  | 1.224699  | 0.005119  |
| 4.C   | 3.494491  | 0.963955  | -0.002085 |
| 5.C   | 3.688934  | -0.425965 | -0.009323 |
| 6.C   | 2.416330  | -0.989657 | -0.006031 |
| 7.N   | -0.494550 | 0.730536  | 1.262366  |
| 8.C   | -1.240119 | 0.258079  | 2.288948  |
| 9.C   | -1.357229 | 1.282473  | 3.226447  |
| 10.C  | -0.644578 | 2.370775  | 2.702042  |
| 11.N  | -0.125887 | 2.014593  | 1.512811  |
| 12.N  | -0.488482 | 0.764301  | -1.253175 |
| 13.N  | -0.122959 | 2.055922  | -1.465465 |
| 14.C  | -0.651663 | 2.451090  | -2.637592 |
| 15.C  | -1.367264 | 1.379854  | -3.191740 |
| 16.C  | -1.241567 | 0.325011  | -2.289332 |
| 17.H  | -0.411709 | -1.119963 | -0.018746 |
| 18.Mo | 0.974895  | 3.234088  | 0.037734  |
| 19.O  | -0.234720 | 4.475415  | 0.044487  |
| 20.C  | -1.786253 | -1.055656 | -2.364119 |
| 21.C  | -0.453597 | 3.834934  | -3.132260 |
| 22.C  | 4.505029  | 2.048697  | -0.002137 |
| 23.C  | 2.008615  | -2.419012 | -0.008495 |
| 24.C  | -1.787191 | -1.123473 | 2.322263  |
| 25.C  | -0.442474 | 3.736141  | 3.244008  |
| 26.H  | 4.646976  | -0.961079 | -0.016753 |
| 27.H  | 2.908478  | -3.063840 | 0.000407  |
| 28.H  | 1.393101  | -2.673437 | 0.880430  |
| 29.H  | 1.408562  | -2.676091 | -0.907235 |
| 30.H  | 4.399039  | 2.671119  | 0.912431  |
| 31.H  | 4.337604  | 2.723588  | -0.868834 |
| 32.H  | 5.528451  | 1.629989  | -0.048392 |
| 33.H  | -0.993199 | 4.557122  | -2.480927 |
| 34.H  | -0.818679 | 3.939931  | -4.171505 |
| 35.H  | 0.623285  | 4.104106  | -3.075844 |
| 36.H  | -1.916561 | 1.370108  | -4.141650 |
| 37.H  | -2.376710 | -1.174304 | -3.293074 |
| 38.H  | -2.446926 | -1.285224 | -1.501384 |
| 39.H  | -0.977570 | -1.816959 | -2.368335 |
| 40.H  | -0.816526 | 3.807364  | 4.282961  |
| 41.H  | 0.636347  | 4.000265  | 3.206617  |
| 42.H  | -0.972568 | 4.483414  | 2.613639  |
| 43.H  | -2.400131 | -1.260795 | 3.233920  |
| 44.H  | -2.427150 | -1.334105 | 1.439548  |
| 45.H  | -0.979626 | -1.886296 | 2.330032  |
| 46.H  | -1.900918 | 1.241995  | 4.178837  |
| 47.O  | 2.176295  | 3.883814  | 1.451867  |
| 48.O  | 2.186240  | 3.933016  | -1.344961 |
| 49.C  | 2.659031  | 5.254288  | -1.189063 |
| 50.C  | 2.659328  | 5.206157  | 1.353483  |
| 51.C  | 3.457541  | 5.464874  | 0.086963  |
| 52.H  | 3.294781  | 5.503199  | -2.071384 |
| 53.H  | 1.782196  | 5.957199  | -1.189958 |
| 54.H  | 4.355397  | 4.808997  | 0.074411  |
| 55.H  | 3.815432  | 6.520064  | 0.107155  |
| 56.H  | 3.297408  | 5.411480  | 2.245483  |
| 57.H  | 1.788349  | 5.915520  | 1.386327  |

---

---

$D^+ - Tp^*MoO(OCH_2CH_2CH_2O)^+$  in chair conformation

|       |           |           |           |
|-------|-----------|-----------|-----------|
| 1.B   | 0.031028  | -0.023040 | -0.005462 |
| 2.N   | 1.554650  | 0.003165  | -0.004678 |
| 3.N   | 2.183498  | 1.208963  | 0.007059  |
| 4.C   | 3.519226  | 0.970469  | 0.006225  |
| 5.C   | 3.727586  | -0.410097 | -0.005792 |
| 6.C   | 2.462330  | -0.998788 | -0.012219 |
| 7.N   | -0.467147 | 0.708007  | 1.249615  |
| 8.C   | -1.269032 | 0.286843  | 2.253797  |
| 9.C   | -1.470593 | 1.369408  | 3.114954  |
| 10.C  | -0.766344 | 2.442416  | 2.572250  |
| 11.N  | -0.152533 | 2.017963  | 1.435871  |
| 12.N  | -0.466973 | 0.745704  | -1.237679 |
| 13.N  | -0.159260 | 2.062689  | -1.380553 |
| 14.C  | -0.772225 | 2.520200  | -2.504214 |
| 15.C  | -1.469114 | 1.461465  | -3.083529 |
| 16.C  | -1.263550 | 0.352683  | -2.257542 |
| 17.H  | -0.383409 | -1.159135 | -0.022478 |
| 18.Mo | 1.062486  | 3.163370  | 0.043113  |
| 19.O  | -0.010769 | 4.525844  | 0.066142  |
| 20.C  | -1.782260 | -1.029669 | -2.391429 |
| 21.C  | -0.631798 | 3.923049  | -2.955623 |
| 22.C  | 4.522067  | 2.061037  | 0.017078  |
| 23.C  | 2.084437  | -2.433268 | -0.024446 |
| 24.C  | -1.796558 | -1.095900 | 2.341145  |
| 25.C  | -0.620131 | 3.829191  | 3.069170  |
| 26.H  | 4.693522  | -0.930710 | -0.009620 |
| 27.H  | 2.994257  | -3.062175 | -0.025568 |
| 28.H  | 1.478859  | -2.704923 | 0.865568  |
| 29.H  | 1.485752  | -2.691724 | -0.923038 |
| 30.H  | 4.401457  | 2.694453  | 0.921905  |
| 31.H  | 4.393752  | 2.719126  | -0.868808 |
| 32.H  | 5.545078  | 1.642104  | 0.007161  |
| 33.H  | -0.955713 | 4.630094  | -2.161063 |
| 34.H  | -1.238465 | 4.100053  | -3.862565 |
| 35.H  | 0.430758  | 4.156540  | -3.186052 |
| 36.H  | -2.059328 | 1.488541  | -4.008171 |
| 37.H  | -2.360279 | -1.125803 | -3.329458 |
| 38.H  | -2.449711 | -1.299061 | -1.545838 |
| 39.H  | -0.959218 | -1.774061 | -2.411404 |
| 40.H  | -1.224083 | 3.978047  | 3.982966  |
| 41.H  | 0.443626  | 4.051930  | 3.304497  |
| 42.H  | -0.943979 | 4.563013  | 2.299193  |
| 43.H  | -2.383549 | -1.217021 | 3.270663  |
| 44.H  | -2.457669 | -1.335604 | 1.481801  |
| 45.H  | -0.977896 | -1.845420 | 2.345892  |
| 46.H  | -2.063034 | 1.369711  | 4.038593  |
| 47.O  | 2.217028  | 3.835206  | 1.407814  |
| 48.O  | 2.207465  | 3.870613  | -1.312175 |
| 49.C  | 2.561286  | 5.252830  | -1.217437 |
| 50.C  | 2.570513  | 5.219093  | 1.350497  |
| 51.C  | 3.324310  | 5.537263  | 0.067782  |
| 52.H  | 3.180956  | 5.505149  | -2.103426 |
| 53.H  | 1.612841  | 5.848265  | -1.250030 |
| 54.H  | 4.290653  | 4.987316  | 0.057247  |
| 55.H  | 3.565992  | 6.624177  | 0.081067  |
| 56.H  | 3.196438  | 5.446571  | 2.238796  |
| 57.H  | 1.622417  | 5.813421  | 1.406099  |

---

---

**D** – Tp\*MoO(OCH<sub>2</sub>CH<sub>2</sub>CH<sub>2</sub>O) in boat conformation

|       |           |           |           |
|-------|-----------|-----------|-----------|
| 1.H   | 0.047540  | -0.049269 | 0.031104  |
| 2.C   | 1.168280  | -0.020234 | 0.002299  |
| 3.C   | 1.629654  | 1.425336  | 0.016740  |
| 4.H   | 2.743034  | 1.453517  | 0.020072  |
| 5.H   | 1.274324  | 1.912256  | 0.953623  |
| 6.C   | 1.112491  | 2.209043  | -1.175148 |
| 7.H   | -0.008599 | 2.232832  | -1.141683 |
| 8.O   | 1.627625  | -0.748607 | -1.114100 |
| 9.O   | 1.532101  | 1.691821  | -2.417593 |
| 10.Mo | 2.573148  | 0.043228  | -2.639492 |
| 11.O  | 4.143713  | 0.438019  | -2.022834 |
| 12.N  | 0.814896  | -0.762613 | -3.991137 |
| 13.N  | 1.069072  | -1.384402 | -5.168569 |
| 14.N  | 3.171126  | 0.683684  | -4.654085 |
| 15.N  | 3.290082  | -1.941810 | -3.255757 |
| 16.N  | 3.144104  | -0.146647 | -5.729316 |
| 17.N  | 3.258238  | -2.365647 | -4.546505 |
| 18.C  | 3.724855  | 1.847657  | -5.039023 |
| 19.C  | 3.666154  | 0.484346  | -6.807692 |
| 20.C  | 4.049669  | 1.760798  | -6.400443 |
| 21.H  | 4.512125  | 2.537312  | -7.022784 |
| 22.C  | 3.877307  | -3.565598 | -4.649256 |
| 23.C  | 3.943045  | -2.866093 | -2.528767 |
| 24.C  | 4.328653  | -3.913803 | -3.377568 |
| 25.H  | 4.874775  | -4.824633 | -3.101361 |
| 26.C  | -0.517521 | -0.757141 | -3.822189 |
| 27.C  | -0.084085 | -1.778552 | -5.758402 |
| 28.C  | -1.124300 | -1.389478 | -4.919483 |
| 29.H  | -2.197991 | -1.545629 | -5.084389 |
| 30.B  | 2.520484  | -1.542628 | -5.610255 |
| 31.H  | 1.527929  | -0.539995 | 0.923843  |
| 32.H  | 1.457406  | 3.270182  | -1.107952 |
| 33.C  | 3.929225  | 2.952666  | -4.071555 |
| 34.H  | 4.277358  | 3.867916  | -4.586260 |
| 35.H  | 2.983498  | 3.156506  | -3.524434 |
| 36.H  | 4.678657  | 2.655805  | -3.305315 |
| 37.C  | 3.760893  | -0.149844 | -8.148220 |
| 38.H  | 4.241141  | 0.550212  | -8.858458 |
| 39.H  | 4.361256  | -1.083571 | -8.121476 |
| 40.H  | 2.759417  | -0.416126 | -8.548204 |
| 41.C  | 3.998070  | -4.305641 | -5.932257 |
| 42.H  | 4.553832  | -3.720071 | -6.694902 |
| 43.H  | 4.539900  | -5.256160 | -5.764625 |
| 44.H  | 3.003294  | -4.544732 | -6.364491 |
| 45.C  | 4.176573  | -2.669219 | -1.077682 |
| 46.H  | 4.582114  | -3.588716 | -0.615078 |
| 47.H  | 4.891525  | -1.832914 | -0.915395 |
| 48.H  | 3.228341  | -2.374911 | -0.578194 |
| 49.C  | -0.125082 | -2.490591 | -7.062421 |
| 50.H  | 0.329897  | -1.887707 | -7.876983 |
| 51.H  | 0.423876  | -3.455614 | -7.022704 |
| 52.H  | -1.175630 | -2.704365 | -7.338317 |
| 53.C  | -1.153341 | -0.159336 | -2.623603 |
| 54.H  | -2.255400 | -0.161230 | -2.724385 |
| 55.H  | -0.871153 | -0.727451 | -1.711455 |
| 56.H  | -0.798283 | 0.883032  | -2.480671 |
| 57.H  | 2.581507  | -2.110116 | -6.681419 |

---

---

$D^+ - Tp^*MoO(OCH_2CH_2CH_2O)^+$  in boat conformation

|       |           |           |           |
|-------|-----------|-----------|-----------|
| 1.H   | 0.071180  | -0.035182 | 0.099276  |
| 2.C   | 1.183724  | 0.021413  | 0.034146  |
| 3.C   | 1.657853  | 1.463638  | 0.027955  |
| 4.H   | 2.767889  | 1.495142  | 0.095621  |
| 5.H   | 1.259983  | 1.959841  | 0.942014  |
| 6.C   | 1.187091  | 2.258533  | -1.177558 |
| 7.H   | 0.079155  | 2.391416  | -1.158504 |
| 8.O   | 1.583166  | -0.677953 | -1.142567 |
| 9.O   | 1.518354  | 1.632634  | -2.416868 |
| 10.Mo | 2.477926  | 0.006537  | -2.672089 |
| 11.O  | 4.000234  | 0.436013  | -1.959984 |
| 12.N  | 0.808671  | -0.784831 | -3.995629 |
| 13.N  | 1.034656  | -1.402540 | -5.183207 |
| 14.N  | 3.201209  | 0.619497  | -4.622485 |
| 15.N  | 3.321671  | -1.888124 | -3.296446 |
| 16.N  | 3.102891  | -0.161181 | -5.732315 |
| 17.N  | 3.221609  | -2.371459 | -4.564223 |
| 18.C  | 3.863399  | 1.757361  | -4.962274 |
| 19.C  | 3.690851  | 0.464333  | -6.777623 |
| 20.C  | 4.175154  | 1.693478  | -6.317965 |
| 21.H  | 4.695520  | 2.455061  | -6.912168 |
| 22.C  | 3.913992  | -3.528106 | -4.662524 |
| 23.C  | 4.096488  | -2.744679 | -2.576096 |
| 24.C  | 4.471257  | -3.796493 | -3.406857 |
| 25.H  | 5.078565  | -4.668554 | -3.133667 |
| 26.C  | -0.531581 | -0.756406 | -3.802682 |
| 27.C  | -0.135437 | -1.770289 | -5.755159 |
| 28.C  | -1.154900 | -1.368570 | -4.894229 |
| 29.H  | -2.233619 | -1.504721 | -5.043804 |
| 30.B  | 2.474309  | -1.561505 | -5.637311 |
| 31.H  | 1.601688  | -0.526404 | 0.907824  |
| 32.H  | 1.645245  | 3.273169  | -1.180856 |
| 33.C  | 4.128875  | 2.825160  | -3.972813 |
| 34.H  | 4.709018  | 3.645930  | -4.432581 |
| 35.H  | 3.175329  | 3.236737  | -3.575555 |
| 36.H  | 4.693093  | 2.421242  | -3.103918 |
| 37.C  | 3.771138  | -0.128043 | -8.133830 |
| 38.H  | 4.237016  | 0.591902  | -8.832270 |
| 39.H  | 4.380190  | -1.056574 | -8.138668 |
| 40.H  | 2.765757  | -0.392520 | -8.522789 |
| 41.C  | 4.020375  | -4.303908 | -5.920480 |
| 42.H  | 4.586994  | -3.746044 | -6.695968 |
| 43.H  | 4.547081  | -5.257911 | -5.731597 |
| 44.H  | 3.020629  | -4.532332 | -6.344548 |
| 45.C  | 4.396669  | -2.508283 | -1.146308 |
| 46.H  | 5.030745  | -3.319360 | -0.744134 |
| 47.H  | 4.919141  | -1.536284 | -1.011661 |
| 48.H  | 3.459791  | -2.456115 | -0.550101 |
| 49.C  | -0.211351 | -2.468107 | -7.062238 |
| 50.H  | 0.229145  | -1.859155 | -7.879510 |
| 51.H  | 0.329736  | -3.437408 | -7.042064 |
| 52.H  | -1.268086 | -2.671486 | -7.318534 |
| 53.C  | -1.159064 | -0.162512 | -2.599415 |
| 54.H  | -2.259529 | -0.153096 | -2.706724 |
| 55.H  | -0.899441 | -0.746376 | -1.690737 |
| 56.H  | -0.806507 | 0.878841  | -2.444700 |
| 57.H  | 2.540601  | -2.123072 | -6.706652 |

---

---

E – Tp\*MoO[OCH(CH<sub>3</sub>)CH<sub>2</sub>CH(CH<sub>3</sub>)O] in chair conformation

|      |           |           |           |
|------|-----------|-----------|-----------|
| 1.C  | -0.007924 | 0.039577  | -0.248665 |
| 2.C  | 2.557167  | 0.045570  | -0.209734 |
| 3.O  | -0.116833 | 1.409768  | 0.099477  |
| 4.O  | 2.649718  | 1.415081  | 0.145658  |
| 5.Mo | 1.274835  | 2.647499  | -0.520596 |
| 6.O  | 1.304575  | 2.281883  | -2.214953 |
| 7.N  | 1.233412  | 3.643340  | 1.598546  |
| 8.N  | 1.225323  | 4.994500  | 1.724805  |
| 9.N  | 2.764876  | 4.250820  | -0.736311 |
| 10.N | -0.211107 | 4.247091  | -0.791403 |
| 11.N | 2.527736  | 5.523778  | -0.323729 |
| 12.N | 0.010879  | 5.522110  | -0.376703 |
| 13.C | 3.964523  | 4.226296  | -1.344494 |
| 14.C | 3.576194  | 6.314705  | -0.653467 |
| 15.C | 4.511214  | 5.517234  | -1.311024 |
| 16.H | 5.477954  | 5.839602  | -1.718118 |
| 17.C | -1.022757 | 6.312193  | -0.752091 |
| 18.C | -1.385820 | 4.220302  | -1.446262 |
| 19.C | -1.931985 | 5.511953  | -1.441673 |
| 20.H | -2.881595 | 5.832912  | -1.888290 |
| 21.C | 1.204452  | 3.125189  | 2.839084  |
| 22.C | 1.190913  | 5.348856  | 3.030918  |
| 23.C | 1.177013  | 4.172084  | 3.774222  |
| 24.H | 1.150074  | 4.083855  | 4.867811  |
| 25.B | 1.252043  | 5.852978  | 0.461938  |
| 26.C | -1.239594 | -0.675769 | 0.263874  |
| 27.H | -2.157213 | -0.186162 | -0.122942 |
| 28.H | -1.266259 | -0.628570 | 1.374710  |
| 29.H | -1.244516 | -1.742100 | -0.047021 |
| 30.C | 3.776501  | -0.666194 | 0.336137  |
| 31.H | 4.702818  | -0.172062 | -0.023336 |
| 32.H | 3.794609  | -1.731670 | 0.022791  |
| 33.H | 3.771421  | -0.621588 | 1.447355  |
| 34.C | 4.492989  | 2.972465  | -1.934180 |
| 35.H | 5.533432  | 3.108458  | -2.284486 |
| 36.H | 4.445015  | 2.153809  | -1.183345 |
| 37.H | 3.858488  | 2.651608  | -2.789356 |
| 38.C | 3.633733  | 7.761926  | -0.321218 |
| 39.H | 4.572118  | 8.197790  | -0.714408 |
| 40.H | 2.780630  | 8.320361  | -0.760922 |
| 41.H | 3.605894  | 7.932834  | 0.776028  |
| 42.C | -1.090937 | 7.761481  | -0.430976 |
| 43.H | -0.223194 | 8.316836  | -0.845300 |
| 44.H | -2.015179 | 8.195207  | -0.858510 |
| 45.H | -1.099847 | 7.939446  | 0.665447  |
| 46.C | -1.891653 | 2.963532  | -2.049413 |
| 47.H | -2.922489 | 3.094310  | -2.428947 |
| 48.H | -1.232161 | 2.644942  | -2.886329 |
| 49.H | -1.861021 | 2.145898  | -1.296568 |
| 50.C | 1.172377  | 6.763286  | 3.487003  |
| 51.H | 2.070425  | 7.319621  | 3.143550  |
| 52.H | 0.283131  | 7.308316  | 3.104515  |
| 53.H | 1.147778  | 6.798711  | 4.593133  |
| 54.C | 1.203985  | 1.661984  | 3.076181  |
| 55.H | 1.182023  | 1.441441  | 4.160348  |
| 56.H | 0.324659  | 1.195406  | 2.581439  |
| 57.H | 2.105922  | 1.200619  | 2.618765  |
| 58.H | 1.245287  | 7.031482  | 0.751865  |
| 59.H | 2.556246  | -0.017453 | -1.333279 |
| 60.H | 0.025947  | -0.026706 | -1.371480 |
| 61.C | 1.268277  | -0.588360 | 0.290699  |
| 62.H | 1.251565  | -0.546054 | 1.405252  |
| 63.H | 1.274991  | -1.664607 | -0.001171 |

---



---

$E^+ - Tp^*MoO[OCH(CH_3)CH_2CH(CH_3)O]^+$  in chair conformation

|      |           |           |           |
|------|-----------|-----------|-----------|
| 1.C  | -0.022164 | 0.078288  | -0.320517 |
| 2.C  | 2.574310  | 0.085123  | -0.279011 |
| 3.O  | -0.081046 | 1.435649  | 0.159099  |
| 4.O  | 2.611089  | 1.442264  | 0.203442  |
| 5.Mo | 1.271547  | 2.651699  | -0.400845 |
| 6.O  | 1.299758  | 2.108627  | -2.048230 |
| 7.N  | 1.231203  | 3.660498  | 1.615920  |
| 8.N  | 1.224083  | 5.012894  | 1.757826  |
| 9.N  | 2.689464  | 4.261635  | -0.759088 |
| 10.N | -0.134851 | 4.258344  | -0.813638 |
| 11.N | 2.513222  | 5.528428  | -0.298259 |
| 12.N | 0.022770  | 5.526841  | -0.350809 |
| 13.C | 3.851613  | 4.224632  | -1.461144 |
| 14.C | 3.549996  | 6.302487  | -0.692134 |
| 15.C | 4.421114  | 5.496696  | -1.430470 |
| 16.H | 5.368015  | 5.806185  | -1.890480 |
| 17.C | -0.996519 | 6.299630  | -0.790032 |
| 18.C | -1.267304 | 4.218843  | -1.562679 |
| 19.C | -1.836893 | 5.491112  | -1.560464 |
| 20.H | -2.764497 | 5.798787  | -2.059400 |
| 21.C | 1.204949  | 3.121162  | 2.860147  |
| 22.C | 1.193373  | 5.346437  | 3.067954  |
| 23.C | 1.180658  | 4.156935  | 3.797017  |
| 24.H | 1.156606  | 4.057215  | 4.889549  |
| 25.B | 1.250424  | 5.877612  | 0.501885  |
| 26.C | -1.252725 | -0.649654 | 0.152803  |
| 27.H | -2.169181 | -0.115043 | -0.169855 |
| 28.H | -1.259861 | -0.720337 | 1.261353  |
| 29.H | -1.282399 | -1.677542 | -0.264750 |
| 30.C | 3.793246  | -0.637046 | 0.231845  |
| 31.H | 4.716462  | -0.097450 | -0.061850 |
| 32.H | 3.841202  | -1.664254 | -0.185528 |
| 33.H | 3.766398  | -0.708836 | 1.340024  |
| 34.C | 4.344797  | 2.977488  | -2.088939 |
| 35.H | 5.285838  | 3.165459  | -2.637448 |
| 36.H | 4.529591  | 2.197863  | -1.317185 |
| 37.H | 3.592228  | 2.563004  | -2.794624 |
| 38.C | 3.657743  | 7.742021  | -0.353953 |
| 39.H | 4.603712  | 8.152640  | -0.753670 |
| 40.H | 2.817870  | 8.326942  | -0.784210 |
| 41.H | 3.644449  | 7.904807  | 0.744014  |
| 42.C | -1.117133 | 7.740600  | -0.462526 |
| 43.H | -0.261810 | 8.323746  | -0.863838 |
| 44.H | -2.047447 | 8.149256  | -0.899281 |
| 45.H | -1.144796 | 7.908479  | 0.634391  |
| 46.C | -1.735386 | 2.969168  | -2.204550 |
| 47.H | -2.659148 | 3.152980  | -2.782951 |
| 48.H | -0.959193 | 2.556914  | -2.885442 |
| 49.H | -1.941689 | 2.189551  | -1.438300 |
| 50.C | 1.177995  | 6.751090  | 3.545117  |
| 51.H | 2.078959  | 7.307381  | 3.211089  |
| 52.H | 0.290847  | 7.302177  | 3.168239  |
| 53.H | 1.151421  | 6.772817  | 4.650635  |
| 54.C | 1.204821  | 1.657791  | 3.092902  |
| 55.H | 1.185578  | 1.440911  | 4.176808  |
| 56.H | 0.320189  | 1.185509  | 2.613760  |
| 57.H | 2.109200  | 1.190731  | 2.646612  |
| 58.H | 1.243814  | 7.053504  | 0.784753  |
| 59.H | 2.587821  | 0.156323  | -1.399054 |
| 60.H | -0.000764 | 0.148426  | -1.440463 |
| 61.C | 1.270513  | -0.572081 | 0.159185  |
| 62.H | 1.252954  | -0.646771 | 1.271912  |
| 63.H | 1.279434  | -1.613182 | -0.237421 |

---

---

**E – Tp\*MoO[OCH(CH<sub>3</sub>)CH<sub>2</sub>CH(CH<sub>3</sub>)O] in boat conformation**

|       |           |           |           |
|-------|-----------|-----------|-----------|
| 1.H   | 0.033620  | -0.052982 | 0.012552  |
| 2.C   | 1.156355  | -0.035435 | 0.012806  |
| 3.C   | 1.603348  | 1.416299  | 0.008746  |
| 4.H   | 2.720322  | 1.446336  | 0.009978  |
| 5.H   | 1.250612  | 1.902541  | 0.947634  |
| 6.C   | 1.094690  | 2.219703  | -1.175776 |
| 7.H   | -0.028231 | 2.205183  | -1.147629 |
| 8.O   | 1.608712  | -0.742721 | -1.129242 |
| 9.O   | 1.510715  | 1.676385  | -2.417152 |
| 10.Mo | 2.572538  | 0.045825  | -2.639564 |
| 11.O  | 4.140730  | 0.445079  | -2.018022 |
| 12.N  | 0.813352  | -0.759067 | -3.991227 |
| 13.N  | 1.066051  | -1.382784 | -5.167731 |
| 14.N  | 3.179064  | 0.683161  | -4.654188 |
| 15.N  | 3.295692  | -1.937661 | -3.256819 |
| 16.N  | 3.141998  | -0.146241 | -5.730034 |
| 17.N  | 3.256024  | -2.363831 | -4.546713 |
| 18.C  | 3.744132  | 1.841469  | -5.040366 |
| 19.C  | 3.668003  | 0.479796  | -6.809314 |
| 20.C  | 4.064802  | 1.752069  | -6.402496 |
| 21.H  | 4.534296  | 2.524204  | -7.025016 |
| 22.C  | 3.875865  | -3.563074 | -4.652069 |
| 23.C  | 3.955271  | -2.860245 | -2.533317 |
| 24.C  | 4.336337  | -3.908671 | -3.383119 |
| 25.H  | 4.885859  | -4.818050 | -3.108875 |
| 26.C  | -0.518764 | -0.754913 | -3.819930 |
| 27.C  | -0.087487 | -1.779680 | -5.754882 |
| 28.C  | -1.126606 | -1.390160 | -4.915053 |
| 29.H  | -2.200447 | -1.547736 | -5.077541 |
| 30.B  | 2.516707  | -1.541150 | -5.609617 |
| 31.C  | 1.657794  | -0.769081 | 1.241136  |
| 32.H  | 2.769092  | -0.736284 | 1.266053  |
| 33.H  | 1.338713  | -1.831140 | 1.209970  |
| 34.H  | 1.268598  | -0.306086 | 2.173186  |
| 35.C  | 1.565211  | 3.659621  | -1.115724 |
| 36.H  | 2.676902  | 3.687478  | -1.120525 |
| 37.H  | 1.202035  | 4.163319  | -0.194323 |
| 38.H  | 1.195689  | 4.221044  | -1.998373 |
| 39.C  | 3.964375  | 2.945769  | -4.075893 |
| 40.H  | 4.357618  | 3.843591  | -4.588943 |
| 41.H  | 3.016166  | 3.192079  | -3.551587 |
| 42.H  | 4.683857  | 2.627563  | -3.289526 |
| 43.C  | 3.755081  | -0.155041 | -8.149986 |
| 44.H  | 4.237080  | 0.542379  | -8.861630 |
| 45.H  | 4.350313  | -1.092114 | -8.125042 |
| 46.H  | 2.750945  | -0.415749 | -8.546852 |
| 47.C  | 3.990583  | -4.303941 | -5.935137 |
| 48.H  | 4.552885  | -3.723628 | -6.697089 |
| 49.H  | 4.523165  | -5.259615 | -5.767294 |
| 50.H  | 2.994019  | -4.533062 | -6.368437 |
| 51.C  | 4.201077  | -2.664775 | -1.084195 |
| 52.H  | 4.643280  | -3.573595 | -0.634101 |
| 53.H  | 4.889908  | -1.805885 | -0.925902 |
| 54.H  | 3.252522  | -2.406158 | -0.566249 |
| 55.C  | -0.129636 | -2.494890 | -7.057044 |
| 56.H  | 0.325508  | -1.894465 | -7.873313 |
| 57.H  | 0.418476  | -3.460335 | -7.015082 |
| 58.H  | -1.180506 | -2.708489 | -7.331810 |
| 59.C  | -1.153943 | -0.156210 | -2.622085 |
| 60.H  | -2.255956 | -0.156327 | -2.722613 |
| 61.H  | -0.871330 | -0.723754 | -1.709901 |
| 62.H  | -0.795398 | 0.884625  | -2.478738 |
| 63.H  | 2.577014  | -2.109064 | -6.680494 |

---

---

$E^+ - Tp^*MoO[OCH(CH_3)CH_2CH(CH_3)O]^+$  in boat conformation

|       |           |           |           |
|-------|-----------|-----------|-----------|
| 1.H   | 0.049439  | -0.096791 | 0.099658  |
| 2.C   | 1.163548  | -0.025373 | 0.051760  |
| 3.C   | 1.583001  | 1.436423  | 0.028101  |
| 4.H   | 2.695297  | 1.498727  | 0.101003  |
| 5.H   | 1.168290  | 1.916612  | 0.944181  |
| 6.C   | 1.113353  | 2.254527  | -1.165374 |
| 7.H   | -0.002755 | 2.313351  | -1.164099 |
| 8.O   | 1.548781  | -0.686963 | -1.165640 |
| 9.O   | 1.470462  | 1.615738  | -2.404798 |
| 10.Mo | 2.459512  | 0.018540  | -2.668995 |
| 11.O  | 3.975081  | 0.458744  | -1.947982 |
| 12.N  | 0.794109  | -0.776967 | -3.997503 |
| 13.N  | 1.022184  | -1.397196 | -5.182932 |
| 14.N  | 3.199507  | 0.622809  | -4.621618 |
| 15.N  | 3.318890  | -1.877957 | -3.292184 |
| 16.N  | 3.096363  | -0.159759 | -5.730078 |
| 17.N  | 3.212794  | -2.363649 | -4.558881 |
| 18.C  | 3.893620  | 1.742315  | -4.958062 |
| 19.C  | 3.710451  | 0.447854  | -6.771169 |
| 20.C  | 4.217942  | 1.666387  | -6.310662 |
| 21.H  | 4.762786  | 2.413741  | -6.901017 |
| 22.C  | 3.919721  | -3.511816 | -4.663566 |
| 23.C  | 4.109622  | -2.724541 | -2.579736 |
| 24.C  | 4.491431  | -3.772350 | -3.414096 |
| 25.H  | 5.115508  | -4.634301 | -3.146633 |
| 26.C  | -0.546233 | -0.755239 | -3.804872 |
| 27.C  | -0.144276 | -1.772682 | -5.753903 |
| 28.C  | -1.166634 | -1.373429 | -4.894408 |
| 29.H  | -2.244426 | -1.515316 | -5.043747 |
| 30.B  | 2.463744  | -1.557266 | -5.632599 |
| 31.C  | 1.779360  | -0.779891 | 1.205646  |
| 32.H  | 2.887627  | -0.722098 | 1.147859  |
| 33.H  | 1.472223  | -1.844799 | 1.185282  |
| 34.H  | 1.456543  | -0.340386 | 2.172477  |
| 35.C  | 1.699482  | 3.645983  | -1.170254 |
| 36.H  | 2.809150  | 3.589995  | -1.189138 |
| 37.H  | 1.393397  | 4.197846  | -0.257004 |
| 38.H  | 1.351028  | 4.214661  | -2.055724 |
| 39.C  | 4.184111  | 2.807591  | -3.973018 |
| 40.H  | 4.797990  | 3.603406  | -4.433191 |
| 41.H  | 3.243657  | 3.257539  | -3.586393 |
| 42.H  | 4.725266  | 2.390337  | -3.095704 |
| 43.C  | 3.792411  | -0.152295 | -8.123960 |
| 44.H  | 4.283475  | 0.553567  | -8.819566 |
| 45.H  | 4.379092  | -1.095085 | -8.117928 |
| 46.H  | 2.785707  | -0.394234 | -8.523845 |
| 47.C  | 4.026551  | -4.283936 | -5.924168 |
| 48.H  | 4.571817  | -3.713808 | -6.705973 |
| 49.H  | 4.575317  | -5.226946 | -5.742766 |
| 50.H  | 3.026797  | -4.533243 | -6.336250 |
| 51.C  | 4.428268  | -2.484759 | -1.154407 |
| 52.H  | 5.092495  | -3.279279 | -0.767777 |
| 53.H  | 4.926280  | -1.498914 | -1.026422 |
| 54.H  | 3.502422  | -2.459622 | -0.538923 |
| 55.C  | -0.218163 | -2.476337 | -7.058174 |
| 56.H  | 0.232164  | -1.875020 | -7.875644 |
| 57.H  | 0.315008  | -3.449881 | -7.029786 |
| 58.H  | -1.274939 | -2.672740 | -7.319420 |
| 59.C  | -1.178393 | -0.161450 | -2.603999 |
| 60.H  | -2.279265 | -0.172223 | -2.705899 |
| 61.H  | -0.902299 | -0.731050 | -1.691466 |
| 62.H  | -0.842367 | 0.886313  | -2.459533 |
| 63.H  | 2.530138  | -2.121155 | -6.700632 |

---

---

F – Tp\*MoO[O(CH<sub>2</sub>)<sub>4</sub>O] in boat-twist conformation

|      |           |           |           |
|------|-----------|-----------|-----------|
| 1.O  | -0.119530 | 0.082737  | 0.043156  |
| 2.O  | 2.728345  | -0.140106 | 0.227218  |
| 3.Mo | 1.426840  | 1.303353  | 0.068547  |
| 4.O  | 1.415068  | 1.773563  | -1.600635 |
| 5.N  | 1.300435  | 1.248138  | 2.403497  |
| 6.N  | 1.425182  | 2.384537  | 3.132512  |
| 7.N  | 3.047996  | 2.694045  | 0.601078  |
| 8.N  | 0.098469  | 3.007536  | 0.539567  |
| 9.N  | 2.908169  | 3.638547  | 1.568438  |
| 10.N | 0.416120  | 3.933153  | 1.481872  |
| 11.C | 4.269505  | 2.835034  | 0.055768  |
| 12.C | 4.038721  | 4.378530  | 1.653087  |
| 13.C | 4.929023  | 3.893444  | 0.696414  |
| 14.H | 5.939859  | 4.268078  | 0.491081  |
| 15.C | -0.509657 | 4.921523  | 1.488337  |
| 16.C | -1.031901 | 3.408166  | -0.069038 |
| 17.C | -1.448320 | 4.618545  | 0.504991  |
| 18.C | 1.133094  | 0.231742  | 3.265991  |
| 19.C | 1.333864  | 2.110214  | 4.455656  |
| 20.C | 1.143637  | 0.736839  | 4.576927  |
| 21.B | 1.621464  | 3.710579  | 2.400826  |
| 22.C | -0.426161 | -0.720004 | -1.069073 |
| 23.H | -1.502164 | -1.012925 | -0.995344 |
| 24.H | -0.299948 | -0.113757 | -2.007056 |
| 25.C | 2.756489  | -1.461877 | -0.245647 |
| 26.H | 3.822635  | -1.695985 | -0.488693 |
| 27.H | 2.462258  | -2.159535 | 0.581434  |
| 28.C | 0.413167  | -1.979337 | -1.194628 |
| 29.H | -0.030410 | -2.572311 | -2.028186 |
| 30.H | 0.289834  | -2.593733 | -0.270697 |
| 31.C | 1.899473  | -1.758912 | -1.465565 |
| 32.H | 2.037233  | -0.936046 | -2.207804 |
| 33.H | 2.318370  | -2.679556 | -1.932708 |
| 34.H | -2.333404 | 5.209305  | 0.236983  |
| 35.H | 1.026163  | 0.168857  | 5.508624  |
| 36.C | -1.638182 | 2.618589  | -1.167793 |
| 37.H | -2.567531 | 3.098485  | -1.528186 |
| 38.H | -0.921165 | 2.520661  | -2.012011 |
| 39.H | -1.860378 | 1.587398  | -0.819978 |
| 40.C | -0.451437 | 6.077969  | 2.419966  |
| 41.H | 0.482401  | 6.665078  | 2.290774  |
| 42.H | -1.310374 | 6.750681  | 2.233142  |
| 43.H | -0.489629 | 5.753856  | 3.481652  |
| 44.C | 4.210743  | 5.485541  | 2.629567  |
| 45.H | 5.211455  | 5.941518  | 2.503639  |
| 46.H | 3.447441  | 6.280166  | 2.491190  |
| 47.H | 4.122790  | 5.126939  | 3.677080  |
| 48.C | 4.712283  | 1.956269  | -1.053346 |
| 49.H | 4.073032  | 2.113626  | -1.949531 |
| 50.H | 5.766988  | 2.156905  | -1.319704 |
| 51.H | 4.586209  | 0.891703  | -0.760278 |
| 52.C | 1.428752  | 3.155670  | 5.507911  |
| 53.H | 2.400705  | 3.692229  | 5.470325  |
| 54.H | 0.628680  | 3.919367  | 5.403995  |
| 55.H | 1.331626  | 2.689676  | 6.507304  |
| 56.C | 0.993598  | -1.170316 | 2.801647  |
| 57.H | 0.502450  | -1.792205 | 3.575047  |
| 58.H | 0.400885  | -1.199137 | 1.861532  |
| 59.H | 1.990736  | -1.610639 | 2.582687  |
| 60.H | 1.704795  | 4.623114  | 3.196727  |

---

---

$F^+ - Tp^*MoO[O(CH_2)_4O]^+$  in boat-twist conformation

|      |           |           |           |
|------|-----------|-----------|-----------|
| 1.O  | -0.121356 | 0.114576  | 0.075718  |
| 2.O  | 2.630312  | -0.190929 | 0.336068  |
| 3.Mo | 1.404637  | 1.245173  | 0.179808  |
| 4.O  | 1.473055  | 1.546431  | -1.524692 |
| 5.N  | 1.303664  | 1.252201  | 2.427031  |
| 6.N  | 1.406905  | 2.380623  | 3.175460  |
| 7.N  | 2.968342  | 2.705487  | 0.607015  |
| 8.N  | 0.179035  | 3.024377  | 0.514161  |
| 9.N  | 2.881231  | 3.625652  | 1.604947  |
| 10.N | 0.420898  | 3.922034  | 1.506298  |
| 11.C | 4.148032  | 2.891974  | -0.036117 |
| 12.C | 3.993025  | 4.395491  | 1.611009  |
| 13.C | 4.821191  | 3.947074  | 0.578857  |
| 14.H | 5.808012  | 4.344964  | 0.310728  |
| 15.C | -0.472236 | 4.934719  | 1.434040  |
| 16.C | -0.882888 | 3.471411  | -0.204918 |
| 17.C | -1.318298 | 4.671823  | 0.355007  |
| 18.C | 1.169294  | 0.205939  | 3.278402  |
| 19.C | 1.337265  | 2.076639  | 4.491176  |
| 20.C | 1.179405  | 0.693038  | 4.587608  |
| 21.B | 1.605894  | 3.709594  | 2.455091  |
| 22.C | -0.466413 | -0.659825 | -1.062830 |
| 23.H | -1.527799 | -0.971154 | -0.952235 |
| 24.H | -0.369044 | -0.004104 | -1.965514 |
| 25.C | 2.830243  | -1.384057 | -0.408153 |
| 26.H | 3.889849  | -1.381485 | -0.755083 |
| 27.H | 2.733662  | -2.225778 | 0.320872  |
| 28.C | 0.427410  | -1.881062 | -1.225242 |
| 29.H | -0.037846 | -2.484457 | -2.037412 |
| 30.H | 0.365300  | -2.507219 | -0.304545 |
| 31.C | 1.894411  | -1.598247 | -1.580268 |
| 32.H | 1.964117  | -0.735963 | -2.283850 |
| 33.H | 2.306432  | -2.472155 | -2.133548 |
| 34.H | -2.162104 | 5.286763  | 0.017782  |
| 35.H | 1.082148  | 0.106926  | 5.510216  |
| 36.C | -1.434085 | 2.723021  | -1.357240 |
| 37.H | -2.216223 | 3.318976  | -1.862651 |
| 38.H | -0.637090 | 2.477831  | -2.092185 |
| 39.H | -1.886313 | 1.763605  | -1.024657 |
| 40.C | -0.473248 | 6.080543  | 2.375339  |
| 41.H | 0.463364  | 6.672084  | 2.299832  |
| 42.H | -1.322702 | 6.751725  | 2.148862  |
| 43.H | -0.566984 | 5.744081  | 3.428800  |
| 44.C | 4.207344  | 5.498760  | 2.578533  |
| 45.H | 5.201567  | 5.954741  | 2.414362  |
| 46.H | 3.440343  | 6.293956  | 2.468251  |
| 47.H | 4.159680  | 5.137721  | 3.627036  |
| 48.C | 4.561020  | 2.042092  | -1.176976 |
| 49.H | 3.799529  | 2.064187  | -1.986421 |
| 50.H | 5.528520  | 2.386844  | -1.585791 |
| 51.H | 4.669121  | 0.982207  | -0.858833 |
| 52.C | 1.425446  | 3.098361  | 5.563061  |
| 53.H | 2.394198  | 3.640094  | 5.533637  |
| 54.H | 0.619770  | 3.856865  | 5.473155  |
| 55.H | 1.333157  | 2.614305  | 6.553281  |
| 56.C | 1.054811  | -1.194201 | 2.804595  |
| 57.H | 0.749861  | -1.858117 | 3.634634  |
| 58.H | 0.312124  | -1.275545 | 1.982803  |
| 59.H | 2.029887  | -1.552795 | 2.409375  |
| 60.H | 1.685269  | 4.622562  | 3.244420  |

---

---

F – Tp\*MoO[O(CH<sub>2</sub>)<sub>4</sub>O] in chair conformation

|      |           |           |           |
|------|-----------|-----------|-----------|
| 1.O  | -0.005204 | 0.051267  | -0.056003 |
| 2.O  | 2.823621  | 0.004666  | -0.194269 |
| 3.Mo | 1.441524  | 1.386219  | -0.033075 |
| 4.O  | 1.360461  | 1.987977  | -1.655751 |
| 5.N  | 1.493054  | 1.148196  | 2.296265  |
| 6.N  | 1.569620  | 2.241849  | 3.097017  |
| 7.N  | 2.996853  | 2.842468  | 0.524733  |
| 8.N  | 0.021129  | 2.940682  | 0.639182  |
| 9.N  | 2.833263  | 3.721185  | 1.548751  |
| 10.N | 0.320868  | 3.812478  | 1.637124  |
| 11.C | 4.165162  | 3.123382  | -0.080739 |
| 12.C | 3.897259  | 4.555732  | 1.611904  |
| 13.C | 4.766829  | 4.202951  | 0.581348  |
| 14.H | 5.726424  | 4.677851  | 0.340870  |
| 15.C | -0.679960 | 4.714543  | 1.775505  |
| 16.C | -1.170687 | 3.291776  | 0.125227  |
| 17.C | -1.648723 | 4.412297  | 0.820695  |
| 18.C | 1.447231  | 0.069037  | 3.097823  |
| 19.C | 1.570927  | 1.876377  | 4.400465  |
| 20.C | 1.493888  | 0.487530  | 4.437019  |
| 21.B | 1.602183  | 3.627876  | 2.458084  |
| 22.C | -0.125430 | -0.845193 | -1.139662 |
| 23.H | -1.216409 | -1.002085 | -1.329754 |
| 24.H | 0.296543  | -0.383671 | -2.069606 |
| 25.C | 2.814568  | -1.002672 | -1.183465 |
| 26.H | 3.877692  | -1.292498 | -1.368314 |
| 27.C | 0.506264  | -2.204113 | -0.902154 |
| 28.H | -2.592935 | 4.945521  | 0.652045  |
| 29.H | 1.471879  | -0.148040 | 5.331409  |
| 30.C | -1.761537 | 2.542407  | -1.009647 |
| 31.H | -2.782743 | 2.904593  | -1.232668 |
| 32.H | -1.126997 | 2.653762  | -1.915970 |
| 33.H | -1.785458 | 1.456921  | -0.772885 |
| 34.C | -0.662617 | 5.791081  | 2.799962  |
| 35.H | 0.218578  | 6.456977  | 2.684603  |
| 36.H | -1.576666 | 6.408538  | 2.707691  |
| 37.H | -0.627199 | 5.377439  | 3.830340  |
| 38.C | 4.030471  | 5.621596  | 2.638910  |
| 39.H | 4.972550  | 6.179719  | 2.477095  |
| 40.H | 3.187732  | 6.343489  | 2.596239  |
| 41.H | 4.049139  | 5.201395  | 3.666957  |
| 42.C | 4.613871  | 2.355901  | -1.267179 |
| 43.H | 3.918373  | 2.523135  | -2.118705 |
| 44.H | 5.635217  | 2.656223  | -1.567781 |
| 45.H | 4.582459  | 1.267743  | -1.045089 |
| 46.C | 1.639345  | 2.854715  | 5.517199  |
| 47.H | 2.563486  | 3.469266  | 5.471420  |
| 48.H | 0.778198  | 3.556362  | 5.504238  |
| 49.H | 1.630839  | 2.317255  | 6.484886  |
| 50.C | 1.373434  | -1.306808 | 2.554341  |
| 51.H | 1.076019  | -2.023798 | 3.343460  |
| 52.H | 0.645279  | -1.341322 | 1.715469  |
| 53.H | 2.360111  | -1.614802 | 2.145800  |
| 54.H | 1.664863  | 4.485334  | 3.314759  |
| 55.H | 2.420350  | -0.590965 | -2.149405 |
| 56.C | 2.046759  | -2.250750 | -0.778362 |
| 57.H | 0.180592  | -2.846641 | -1.753003 |
| 58.H | 0.039444  | -2.650220 | 0.004971  |
| 59.H | 2.343440  | -2.476821 | 0.268419  |
| 60.H | 2.434557  | -3.096144 | -1.390808 |

---

---

$F^+ - Tp^*MoO[O(CH_2)_4O]^+$  in chair conformation

|      |           |           |           |
|------|-----------|-----------|-----------|
| 1.O  | 0.086508  | -0.040740 | -0.023798 |
| 2.O  | 2.848271  | 0.032004  | -0.077301 |
| 3.Mo | 1.435579  | 1.293021  | 0.115619  |
| 4.O  | 1.329439  | 1.689432  | -1.571279 |
| 5.N  | 1.489568  | 1.145478  | 2.355535  |
| 6.N  | 1.561384  | 2.241955  | 3.157593  |
| 7.N  | 2.905612  | 2.854538  | 0.514463  |
| 8.N  | 0.090882  | 2.936528  | 0.640596  |
| 9.N  | 2.812470  | 3.702243  | 1.575163  |
| 10.N | 0.334018  | 3.795321  | 1.666727  |
| 11.C | 4.012121  | 3.190791  | -0.195479 |
| 12.C | 3.846813  | 4.574033  | 1.552470  |
| 13.C | 4.630381  | 4.269004  | 0.437211  |
| 14.H | 5.550062  | 4.778837  | 0.123899  |
| 15.C | -0.625177 | 4.746953  | 1.703545  |
| 16.C | -1.037490 | 3.350037  | 0.007281  |
| 17.C | -1.517521 | 4.483875  | 0.661106  |
| 18.C | 1.467844  | 0.053011  | 3.161877  |
| 19.C | 1.585298  | 1.869960  | 4.456923  |
| 20.C | 1.524731  | 0.475886  | 4.490343  |
| 21.B | 1.600972  | 3.623813  | 2.513048  |
| 22.C | -0.221303 | -0.701189 | -1.245074 |
| 23.H | -1.321861 | -0.858851 | -1.293997 |
| 24.H | 0.070355  | 0.000601  | -2.069796 |
| 25.C | 2.889273  | -0.890973 | -1.170078 |
| 26.H | 3.942858  | -1.233852 | -1.254088 |
| 27.C | 0.501214  | -2.031087 | -1.376834 |
| 28.H | -2.420573 | 5.055060  | 0.411553  |
| 29.H | 1.522477  | -0.159665 | 5.384912  |
| 30.C | -1.596989 | 2.631109  | -1.160243 |
| 31.H | -2.492614 | 3.155725  | -1.540880 |
| 32.H | -0.848472 | 2.557121  | -1.978279 |
| 33.H | -1.888520 | 1.594239  | -0.885585 |
| 34.C | -0.643876 | 5.837710  | 2.707997  |
| 35.H | 0.256744  | 6.482169  | 2.628163  |
| 36.H | -1.536322 | 6.473341  | 2.556922  |
| 37.H | -0.673077 | 5.438908  | 3.743541  |
| 38.C | 4.031750  | 5.635442  | 2.571549  |
| 39.H | 4.954203  | 6.206542  | 2.356441  |
| 40.H | 3.179356  | 6.346878  | 2.580962  |
| 41.H | 4.117454  | 5.210265  | 3.593387  |
| 42.C | 4.407855  | 2.455702  | -1.417830 |
| 43.H | 3.566806  | 2.411718  | -2.143643 |
| 44.H | 5.274222  | 2.944126  | -1.900480 |
| 45.H | 4.680246  | 1.406263  | -1.172460 |
| 46.C | 1.663169  | 2.839623  | 5.576567  |
| 47.H | 2.583151  | 3.458339  | 5.518954  |
| 48.H | 0.797307  | 3.534478  | 5.577338  |
| 49.H | 1.671874  | 2.299549  | 6.541760  |
| 50.C | 1.412475  | -1.327524 | 2.628950  |
| 51.H | 1.252422  | -2.050652 | 3.449842  |
| 52.H | 0.595546  | -1.435176 | 1.884624  |
| 53.H | 2.366810  | -1.583706 | 2.118699  |
| 54.H | 1.665346  | 4.488405  | 3.356132  |
| 55.H | 2.620125  | -0.336726 | -2.106128 |
| 56.C | 1.974767  | -2.087587 | -0.922419 |
| 57.H | 0.412852  | -2.315474 | -2.450850 |
| 58.H | -0.051136 | -2.817690 | -0.816681 |
| 59.H | 2.018571  | -2.287642 | 0.170267  |
| 60.H | 2.442641  | -2.976867 | -1.398498 |

---

---

F – Tp\*MoO[O(CH<sub>2</sub>)<sub>4</sub>O] in boat conformation

|      |           |           |           |
|------|-----------|-----------|-----------|
| 1.O  | 1.290975  | 1.358369  | -0.258508 |
| 2.O  | 1.248436  | -1.421489 | -0.270807 |
| 3.Mo | -0.063823 | -0.020729 | 0.098166  |
| 4.O  | -0.233498 | 0.020750  | 1.820914  |
| 5.N  | -0.564317 | 0.135154  | -2.229823 |
| 6.N  | -1.858264 | 0.052637  | -2.636516 |
| 7.N  | -1.624898 | -1.551816 | -0.090910 |
| 8.N  | -1.721111 | 1.435013  | -0.021297 |
| 9.N  | -2.773441 | -1.343876 | -0.787015 |
| 10.N | -2.877358 | 1.170172  | -0.681094 |
| 11.C | -1.711323 | -2.755998 | 0.504256  |
| 12.C | -3.590911 | -2.414356 | -0.653543 |
| 13.C | -2.942800 | -3.335194 | 0.167426  |
| 14.H | -3.324202 | -4.313705 | 0.485597  |
| 15.C | -3.764654 | 2.172748  | -0.474034 |
| 16.C | -1.867774 | 2.604792  | 0.623397  |
| 17.C | -3.151544 | 3.105921  | 0.359430  |
| 18.C | 0.179023  | 0.355612  | -3.328893 |
| 19.C | -1.950365 | 0.218461  | -3.977549 |
| 20.C | -0.659316 | 0.411633  | -4.454369 |
| 21.B | -2.967791 | -0.058320 | -1.594765 |
| 22.C | 2.534045  | 1.557178  | 0.387050  |
| 23.H | 2.489630  | 2.548764  | 0.903891  |
| 24.H | 3.333156  | 1.645440  | -0.394652 |
| 25.C | 2.634353  | -1.249301 | -0.454504 |
| 26.H | 3.055007  | -2.211855 | -0.832432 |
| 27.H | 2.816324  | -0.485351 | -1.245697 |
| 28.C | 2.904121  | 0.490782  | 1.405899  |
| 29.H | 2.012538  | 0.323971  | 2.049621  |
| 30.H | 3.697088  | 0.901773  | 2.070681  |
| 31.C | 3.381309  | -0.831586 | 0.801077  |
| 32.H | 3.316445  | -1.639669 | 1.563905  |
| 33.H | 4.457210  | -0.751694 | 0.514191  |
| 34.H | -3.587922 | 4.041865  | 0.730629  |
| 35.H | -0.358642 | 0.578216  | -5.496676 |
| 36.C | -0.777323 | 3.155395  | 1.464861  |
| 37.H | -1.017073 | 4.182730  | 1.798282  |
| 38.H | -0.615576 | 2.509344  | 2.355169  |
| 39.H | 0.177171  | 3.156405  | 0.895226  |
| 40.C | -5.121441 | 2.189307  | -1.080192 |
| 41.H | -5.714163 | 1.296568  | -0.788909 |
| 42.H | -5.668601 | 3.091331  | -0.745139 |
| 43.H | -5.076362 | 2.204412  | -2.190180 |
| 44.C | -4.921466 | -2.504183 | -1.309295 |
| 45.H | -5.404380 | -3.463550 | -1.041739 |
| 46.H | -5.593041 | -1.677825 | -0.994401 |
| 47.H | -4.838669 | -2.454472 | -2.415745 |
| 48.C | -0.627925 | -3.257256 | 1.383043  |
| 49.H | -0.565893 | -2.637680 | 2.304616  |
| 50.H | -0.808845 | -4.310801 | 1.667863  |
| 51.H | 0.352583  | -3.157117 | 0.870701  |
| 52.C | -3.242218 | 0.196638  | -4.712532 |
| 53.H | -3.790381 | -0.756717 | -4.557579 |
| 54.H | -3.915910 | 1.018275  | -4.387224 |
| 55.H | -3.055576 | 0.314818  | -5.797346 |
| 56.C | 1.653495  | 0.513115  | -3.282978 |
| 57.H | 2.008997  | 1.056709  | -4.179969 |
| 58.H | 1.938405  | 1.074705  | -2.367107 |
| 59.H | 2.163909  | -0.473510 | -3.258246 |
| 60.H | -4.053241 | -0.083888 | -2.136879 |

---



---

$F^+ - Tp^*MoO[O(CH_2)_4O]^+$  in boat conformation

|      |           |           |           |
|------|-----------|-----------|-----------|
| 1.O  | 1.272668  | 1.317964  | -0.309201 |
| 2.O  | 1.317635  | -1.333724 | -0.379201 |
| 3.Mo | -0.034525 | -0.038887 | -0.046619 |
| 4.O  | -0.078434 | -0.082621 | 1.683753  |
| 5.N  | -0.582945 | 0.077019  | -2.254190 |
| 6.N  | -1.871557 | 0.095379  | -2.685531 |
| 7.N  | -1.653983 | -1.473715 | -0.115658 |
| 8.N  | -1.711958 | 1.374311  | 0.009667  |
| 9.N  | -2.782503 | -1.303143 | -0.855332 |
| 10.N | -2.857819 | 1.187319  | -0.700141 |
| 11.C | -1.780681 | -2.629042 | 0.591156  |
| 12.C | -3.625836 | -2.337289 | -0.637979 |
| 13.C | -3.007746 | -3.204038 | 0.269181  |
| 14.H | -3.412166 | -4.150294 | 0.649997  |
| 15.C | -3.764478 | 2.131947  | -0.359702 |
| 16.C | -1.889763 | 2.452097  | 0.812792  |
| 17.C | -3.170971 | 2.958179  | 0.597867  |
| 18.C | 0.207057  | 0.194228  | -3.349989 |
| 19.C | -1.920493 | 0.227068  | -4.029763 |
| 20.C | -0.604170 | 0.295037  | -4.482787 |
| 21.B | -2.983326 | -0.007250 | -1.654525 |
| 22.C | 2.436659  | 1.699134  | 0.427579  |
| 23.H | 2.231228  | 2.692950  | 0.888621  |
| 24.H | 3.250646  | 1.852610  | -0.318937 |
| 25.C | 2.724469  | -1.168508 | -0.328557 |
| 26.H | 3.189764  | -2.143533 | -0.595830 |
| 27.H | 2.990138  | -0.447975 | -1.138549 |
| 28.C | 2.813289  | 0.698553  | 1.499452  |
| 29.H | 1.942173  | 0.579014  | 2.179224  |
| 30.H | 3.613427  | 1.161577  | 2.118542  |
| 31.C | 3.286462  | -0.679004 | 0.995656  |
| 32.H | 3.104672  | -1.438857 | 1.787312  |
| 33.H | 4.390798  | -0.667616 | 0.840415  |
| 34.H | -3.624652 | 3.833047  | 1.080223  |
| 35.H | -0.270729 | 0.403687  | -5.522572 |
| 36.C | -0.823676 | 2.939765  | 1.718209  |
| 37.H | -1.191121 | 3.785906  | 2.327605  |
| 38.H | -0.482020 | 2.127566  | 2.395973  |
| 39.H | 0.059869  | 3.284585  | 1.138351  |
| 40.C | -5.126595 | 2.194850  | -0.942688 |
| 41.H | -5.722129 | 1.292807  | -0.688006 |
| 42.H | -5.662092 | 3.079963  | -0.551168 |
| 43.H | -5.095572 | 2.267505  | -2.049806 |
| 44.C | -4.956079 | -2.444379 | -1.283007 |
| 45.H | -5.442579 | -3.392733 | -0.987868 |
| 46.H | -5.622171 | -1.606987 | -0.986149 |
| 47.H | -4.874932 | -2.423118 | -2.389793 |
| 48.C | -0.720063 | -3.103935 | 1.507493  |
| 49.H | -0.528863 | -2.352961 | 2.304947  |
| 50.H | -1.013658 | -4.060739 | 1.976466  |
| 51.H | 0.238974  | -3.245434 | 0.963968  |
| 52.C | -3.191532 | 0.282692  | -4.793253 |
| 53.H | -3.798422 | -0.635578 | -4.648634 |
| 54.H | -3.817730 | 1.145814  | -4.483891 |
| 55.H | -2.976285 | 0.385392  | -5.873369 |
| 56.C | 1.686969  | 0.192311  | -3.286850 |
| 57.H | 2.109999  | 0.477232  | -4.268095 |
| 58.H | 2.050075  | 0.908166  | -2.519020 |
| 59.H | 2.071041  | -0.817102 | -3.027654 |
| 60.H | -4.070240 | -0.008966 | -2.185065 |

---

---

Tp\*MoO[S(CH<sub>2</sub>)<sub>3</sub>S] in chair conformation

|       |           |           |           |
|-------|-----------|-----------|-----------|
| 1.B   | 0.034588  | -0.015788 | -0.005308 |
| 2.N   | 1.549653  | 0.007041  | -0.004076 |
| 3.N   | 2.208720  | 1.203548  | 0.006973  |
| 4.C   | 3.530663  | 0.916571  | 0.003661  |
| 5.C   | 3.703060  | -0.478584 | -0.008473 |
| 6.C   | 2.424662  | -1.026444 | -0.012899 |
| 7.N   | -0.488702 | 0.678020  | 1.252905  |
| 8.C   | -1.280935 | 0.193639  | 2.238103  |
| 9.C   | -1.513982 | 1.234124  | 3.136502  |
| 10.C  | -0.824111 | 2.347928  | 2.635305  |
| 11.N  | -0.195494 | 1.987778  | 1.492277  |
| 12.N  | -0.487460 | 0.714204  | -1.243287 |
| 13.N  | -0.197842 | 2.032304  | -1.441283 |
| 14.C  | -0.826315 | 2.425840  | -2.573678 |
| 15.C  | -1.512434 | 1.325795  | -3.109677 |
| 16.C  | -1.277260 | 0.258314  | -2.243924 |
| 17.H  | -0.365908 | -1.163366 | -0.022241 |
| 18.Mo | 0.904229  | 3.218419  | 0.042438  |
| 19.O  | -0.212067 | 4.537418  | 0.063057  |
| 20.C  | -1.760497 | -1.141931 | -2.319005 |
| 21.C  | -0.779839 | 3.818533  | -3.066898 |
| 22.C  | 4.596335  | 1.941105  | 0.011723  |
| 23.C  | 2.000634  | -2.448934 | -0.023105 |
| 24.C  | -1.769435 | -1.207044 | 2.268156  |
| 25.C  | -0.774003 | 3.725031  | 3.171883  |
| 26.H  | 4.653701  | -1.023046 | -0.013300 |
| 27.H  | 2.893123  | -3.104428 | -0.027444 |
| 28.H  | 1.389377  | -2.705495 | 0.869009  |
| 29.H  | 1.389395  | -2.693527 | -0.918502 |
| 30.H  | 4.497077  | 2.597070  | 0.905962  |
| 31.H  | 4.501937  | 2.607490  | -0.875129 |
| 32.H  | 5.591679  | 1.455073  | 0.011532  |
| 33.H  | -1.179711 | 4.517555  | -2.299875 |
| 34.H  | -1.373023 | 3.916291  | -3.996919 |
| 35.H  | 0.271437  | 4.133808  | -3.255043 |
| 36.H  | -2.115231 | 1.308438  | -4.024985 |
| 37.H  | -2.358568 | -1.281491 | -3.240595 |
| 38.H  | -2.400324 | -1.405290 | -1.449151 |
| 39.H  | -0.920190 | -1.868314 | -2.337146 |
| 40.H  | -1.379597 | 3.798930  | 4.095806  |
| 41.H  | 0.276525  | 4.026110  | 3.384254  |
| 42.H  | -1.157464 | 4.449662  | 2.420602  |
| 43.H  | -2.372518 | -1.372601 | 3.181881  |
| 44.H  | -2.405550 | -1.441113 | 1.387464  |
| 45.H  | -0.931745 | -1.936590 | 2.267984  |
| 46.H  | -2.118050 | 1.190223  | 4.050002  |
| 47.S  | 2.396434  | 3.876443  | 1.800760  |
| 48.S  | 2.392307  | 3.933270  | -1.696785 |
| 49.C  | 2.899300  | 5.630659  | -1.203807 |
| 50.C  | 2.907677  | 5.586101  | 1.364620  |
| 51.C  | 3.708218  | 5.728546  | 0.078662  |
| 52.H  | 3.499803  | 6.007121  | -2.058260 |
| 53.H  | 1.981858  | 6.255475  | -1.126169 |
| 54.H  | 4.542008  | 4.992595  | 0.063119  |
| 55.H  | 4.176240  | 6.741913  | 0.095494  |
| 56.H  | 3.517876  | 5.930896  | 2.225165  |
| 57.H  | 1.993717  | 6.217806  | 1.315369  |

---

---

Tp\*MoO[S(CH<sub>2</sub>)<sub>3</sub>S]<sup>+</sup> in chair conformation

|       |           |           |           |
|-------|-----------|-----------|-----------|
| 1.B   | 0.055279  | -0.038700 | -0.005306 |
| 2.N   | 1.573931  | 0.017913  | -0.002198 |
| 3.N   | 2.228504  | 1.219238  | 0.010201  |
| 4.C   | 3.556794  | 0.937357  | 0.005704  |
| 5.C   | 3.732197  | -0.450030 | -0.008680 |
| 6.C   | 2.458918  | -1.007076 | -0.013423 |
| 7.N   | -0.485227 | 0.677817  | 1.235518  |
| 8.C   | -1.286263 | 0.233429  | 2.229082  |
| 9.C   | -1.549327 | 1.315797  | 3.071552  |
| 10.C  | -0.876727 | 2.412887  | 2.534630  |
| 11.N  | -0.223870 | 1.998574  | 1.410764  |
| 12.N  | -0.481677 | 0.713651  | -1.226273 |
| 13.N  | -0.224590 | 2.040163  | -1.360066 |
| 14.C  | -0.877765 | 2.487064  | -2.471180 |
| 15.C  | -1.545781 | 1.404939  | -3.043000 |
| 16.C  | -1.279887 | 0.297755  | -2.234321 |
| 17.H  | -0.329901 | -1.184068 | -0.022496 |
| 18.Mo | 0.951170  | 3.178275  | 0.042565  |
| 19.O  | 0.124483  | 4.690332  | 0.068322  |
| 20.C  | -1.746089 | -1.103044 | -2.368389 |
| 21.C  | -0.831348 | 3.893140  | -2.924742 |
| 22.C  | 4.630150  | 1.957855  | 0.013421  |
| 23.C  | 2.054872  | -2.434946 | -0.027076 |
| 24.C  | -1.757654 | -1.169125 | 2.318399  |
| 25.C  | -0.824775 | 3.803684  | 3.032438  |
| 26.H  | 4.686966  | -0.990735 | -0.015211 |
| 27.H  | 2.956150  | -3.076442 | -0.033028 |
| 28.H  | 1.449691  | -2.701437 | 0.864938  |
| 29.H  | 1.449696  | -2.684704 | -0.923916 |
| 30.H  | 4.559574  | 2.608020  | 0.913207  |
| 31.H  | 4.565291  | 2.615681  | -0.881043 |
| 32.H  | 5.620027  | 1.463431  | 0.014386  |
| 33.H  | -1.161304 | 4.591253  | -2.125408 |
| 34.H  | -1.478957 | 4.029088  | -3.810612 |
| 35.H  | 0.210713  | 4.183555  | -3.195202 |
| 36.H  | -2.161493 | 1.421240  | -3.951218 |
| 37.H  | -2.337344 | -1.216056 | -3.296254 |
| 38.H  | -2.386652 | -1.402705 | -1.512029 |
| 39.H  | -0.895263 | -1.814747 | -2.407787 |
| 40.H  | -1.472460 | 3.914358  | 3.921735  |
| 41.H  | 0.218328  | 4.080823  | 3.312566  |
| 42.H  | -1.150989 | 4.528155  | 2.255359  |
| 43.H  | -2.352599 | -1.308624 | 3.240306  |
| 44.H  | -2.396191 | -1.439920 | 1.450968  |
| 45.H  | -0.909489 | -1.884840 | 2.338732  |
| 46.H  | -2.166037 | 1.305941  | 3.979208  |
| 47.S  | 2.408212  | 3.761890  | 1.804813  |
| 48.S  | 2.401098  | 3.818392  | -1.705893 |
| 49.C  | 2.681759  | 5.579731  | -1.227080 |
| 50.C  | 2.688580  | 5.537955  | 1.381284  |
| 51.C  | 3.444015  | 5.759325  | 0.079442  |
| 52.H  | 3.275561  | 6.000328  | -2.064549 |
| 53.H  | 1.691595  | 6.085297  | -1.197073 |
| 54.H  | 4.373186  | 5.144960  | 0.066458  |
| 55.H  | 3.787476  | 6.820963  | 0.095041  |
| 56.H  | 3.287054  | 5.930170  | 2.229808  |
| 57.H  | 1.698600  | 6.045188  | 1.373908  |

---

---

Tp\*MoO(OC<sub>6</sub>H<sub>5</sub>)<sub>2</sub>

|      |           |           |           |
|------|-----------|-----------|-----------|
| 1.Mo | 0.005813  | 0.063155  | 0.020990  |
| 2.O  | 1.737346  | 0.011484  | 0.036930  |
| 3.O  | -0.401178 | 1.989603  | 0.049280  |
| 4.O  | -0.417799 | -0.014498 | 1.965550  |
| 5.N  | -0.087419 | 0.046363  | -2.155326 |
| 6.C  | 0.580907  | 0.800283  | -3.051274 |
| 7.C  | 0.237635  | 0.369613  | -4.339813 |
| 8.C  | -0.663354 | -0.679617 | -4.173000 |
| 9.N  | -0.836660 | -0.858343 | -2.842500 |
| 10.N | -0.134716 | -2.078606 | -0.142775 |
| 11.N | -0.835971 | -2.692415 | -1.133233 |
| 12.C | -0.666686 | -4.032839 | -1.043652 |
| 13.C | 0.181671  | -4.278629 | 0.034538  |
| 14.C | 0.497296  | -3.025910 | 0.577478  |
| 15.N | -2.289497 | -0.273100 | -0.283604 |
| 16.C | -3.367423 | 0.241940  | 0.335976  |
| 17.C | -4.526898 | -0.265839 | -0.274304 |
| 18.C | -4.092024 | -1.120196 | -1.282696 |
| 19.N | -2.737794 | -1.102252 | -1.261482 |
| 20.B | -1.710718 | -1.867704 | -2.088230 |
| 21.H | 0.606324  | 0.773624  | -5.290877 |
| 22.H | 0.529112  | -5.257811 | 0.386232  |
| 23.H | -5.566923 | -0.037017 | -0.008751 |
| 24.C | -1.319146 | -4.993517 | -1.970407 |
| 25.H | -1.037762 | -4.802321 | -3.027290 |
| 26.H | -1.013439 | -6.025423 | -1.712413 |
| 27.H | -2.426523 | -4.935009 | -1.909651 |
| 28.C | 1.370329  | -2.665216 | 1.719075  |
| 29.H | 0.831795  | -1.990662 | 2.418476  |
| 30.H | 1.707271  | -3.571095 | 2.256395  |
| 31.H | 2.257768  | -2.099147 | 1.362131  |
| 32.C | -3.257971 | 1.161358  | 1.493028  |
| 33.H | -4.223232 | 1.672902  | 1.671417  |
| 34.H | -2.974064 | 0.604395  | 2.411604  |
| 35.H | -2.467697 | 1.924663  | 1.335389  |
| 36.C | -4.873833 | -1.943419 | -2.242062 |
| 37.H | -4.680724 | -3.028981 | -2.105163 |
| 38.H | -5.956023 | -1.766205 | -2.092143 |
| 39.H | -4.626253 | -1.697767 | -3.296670 |
| 40.C | 1.512128  | 1.871087  | -2.625253 |
| 41.H | 2.127641  | 2.209335  | -3.480096 |
| 42.H | 0.953179  | 2.746752  | -2.225730 |
| 43.H | 2.174952  | 1.502484  | -1.813615 |
| 44.C | -1.351293 | -1.510248 | -5.194903 |
| 45.H | -1.074900 | -2.582326 | -5.107420 |
| 46.H | -2.456003 | -1.449340 | -5.099957 |
| 47.H | -1.071299 | -1.163087 | -6.207894 |
| 48.H | -2.261641 | -2.603347 | -2.880198 |
| 49.C | -0.089030 | 0.891739  | 2.904336  |
| 50.C | 0.944319  | 1.827645  | 2.722912  |
| 51.C | -0.790825 | 0.875586  | 4.121577  |
| 52.C | 1.257218  | 2.723287  | 3.741187  |
| 53.H | 1.498831  | 1.829152  | 1.770956  |
| 54.C | -0.472809 | 1.779813  | 5.129453  |
| 55.H | -1.587952 | 0.122916  | 4.250393  |
| 56.C | 0.551728  | 2.711860  | 4.945605  |
| 57.H | 2.075007  | 3.447740  | 3.589273  |
| 58.H | -1.033997 | 1.756494  | 6.078229  |
| 59.H | 0.803298  | 3.427902  | 5.744782  |
| 60.C | -1.072987 | 2.942384  | -0.612346 |
| 61.C | -0.868215 | 4.275861  | -0.215273 |
| 62.C | -1.969518 | 2.663933  | -1.658600 |
| 63.C | -1.543143 | 5.309003  | -0.856571 |
| 64.H | -0.175397 | 4.461826  | 0.622493  |
| 65.C | -2.637736 | 3.709683  | -2.290505 |
| 66.H | -2.133073 | 1.615283  | -1.955839 |
| 67.C | -2.432545 | 5.033919  | -1.899318 |
| 68.H | -1.377674 | 6.348910  | -0.530696 |
| 69.H | -3.340069 | 3.479522  | -3.108265 |
| 70.H | -2.970783 | 5.853032  | -2.402358 |

---

---

Tp\*MoO(OC<sub>6</sub>H<sub>5</sub>)<sub>2</sub><sup>+</sup>

|      |           |           |           |
|------|-----------|-----------|-----------|
| 1.Mo | -0.069517 | 0.160912  | 0.024568  |
| 2.O  | 1.649137  | 0.236624  | 0.187397  |
| 3.O  | -0.392770 | 2.033661  | -0.225792 |
| 4.O  | -0.543982 | 0.112098  | 1.894742  |
| 5.N  | -0.074163 | 0.009310  | -2.142264 |
| 6.C  | 0.666446  | 0.699931  | -3.044167 |
| 7.C  | 0.333352  | 0.244084  | -4.321680 |
| 8.C  | -0.630714 | -0.749181 | -4.151041 |
| 9.N  | -0.859046 | -0.870317 | -2.823008 |
| 10.N | -0.110023 | -1.951939 | -0.155535 |
| 11.N | -0.852511 | -2.624344 | -1.075854 |
| 12.C | -0.619550 | -3.950054 | -0.956511 |
| 13.C | 0.304432  | -4.126495 | 0.076850  |
| 14.C | 0.612500  | -2.856019 | 0.559186  |
| 15.N | -2.310981 | -0.190838 | -0.293756 |
| 16.C | -3.388047 | 0.346699  | 0.322524  |
| 17.C | -4.547288 | -0.188011 | -0.253199 |
| 18.C | -4.123462 | -1.080673 | -1.235461 |
| 19.N | -2.769113 | -1.057733 | -1.236891 |
| 20.B | -1.750943 | -1.848190 | -2.050996 |
| 21.H | 0.754378  | 0.593060  | -5.272872 |
| 22.H | 0.705677  | -5.080117 | 0.442289  |
| 23.H | -5.584798 | 0.043914  | 0.018757  |
| 24.C | -1.276762 | -4.965256 | -1.814324 |
| 25.H | -1.031046 | -4.814327 | -2.886352 |
| 26.H | -0.940382 | -5.977693 | -1.522329 |
| 27.H | -2.382044 | -4.925763 | -1.719936 |
| 28.C | 1.522686  | -2.455264 | 1.653404  |
| 29.H | 0.970737  | -1.921468 | 2.457272  |
| 30.H | 2.011081  | -3.345274 | 2.090668  |
| 31.H | 2.304664  | -1.756261 | 1.285980  |
| 32.C | -3.274593 | 1.315897  | 1.438618  |
| 33.H | -4.249370 | 1.806374  | 1.619107  |
| 34.H | -2.959895 | 0.808741  | 2.375585  |
| 35.H | -2.519659 | 2.102287  | 1.230909  |
| 36.C | -4.918267 | -1.945349 | -2.143373 |
| 37.H | -4.734355 | -3.022620 | -1.945241 |
| 38.H | -5.997708 | -1.752301 | -1.997798 |
| 39.H | -4.674530 | -1.761161 | -3.210549 |
| 40.C | 1.651539  | 1.731447  | -2.644556 |
| 41.H | 2.312078  | 1.975657  | -3.497174 |
| 42.H | 1.146990  | 2.668821  | -2.321662 |
| 43.H | 2.274229  | 1.378387  | -1.795222 |
| 44.C | -1.321118 | -1.581575 | -5.166933 |
| 45.H | -1.067138 | -2.656633 | -5.053738 |
| 46.H | -2.424825 | -1.494387 | -5.090498 |
| 47.H | -1.017742 | -1.263274 | -6.181893 |
| 48.H | -2.300583 | -2.610092 | -2.813047 |
| 49.C | -0.092706 | 0.781402  | 2.978803  |
| 50.C | 0.940216  | 1.727736  | 2.888982  |
| 51.C | -0.713611 | 0.516453  | 4.208901  |
| 52.C | 1.340653  | 2.404662  | 4.035581  |
| 53.H | 1.417232  | 1.925108  | 1.914887  |
| 54.C | -0.301348 | 1.202376  | 5.344672  |
| 55.H | -1.515887 | -0.238789 | 4.242286  |
| 56.C | 0.724246  | 2.148640  | 5.261748  |
| 57.H | 2.147052  | 3.152219  | 3.969907  |
| 58.H | -0.787786 | 0.998899  | 6.311736  |
| 59.H | 1.044833  | 2.694584  | 6.163049  |
| 60.C | -1.108294 | 2.973635  | -0.866672 |
| 61.C | -0.805479 | 4.315755  | -0.581282 |
| 62.C | -2.110348 | 2.640609  | -1.791955 |
| 63.C | -1.526238 | 5.323139  | -1.208242 |
| 64.H | -0.014338 | 4.533163  | 0.154448  |
| 65.C | -2.807888 | 3.664821  | -2.421605 |
| 66.H | -2.314132 | 1.579041  | -2.006150 |
| 67.C | -2.527490 | 5.001837  | -2.130052 |
| 68.H | -1.305148 | 6.376806  | -0.975208 |
| 69.H | -3.590195 | 3.413621  | -3.154767 |
| 70.H | -3.094249 | 5.804466  | -2.627807 |

---

---

Tp\*MoO(*p*-C<sub>6</sub>H<sub>4</sub>F)<sub>2</sub>

|      |           |           |           |
|------|-----------|-----------|-----------|
| 1.Mo | 0.856391  | -0.095121 | 0.360974  |
| 2.O  | 2.588095  | -0.144212 | 0.379808  |
| 3.O  | 0.450785  | 1.833269  | 0.390800  |
| 4.O  | 0.432946  | -0.173931 | 2.306228  |
| 5.N  | 0.762922  | -0.111044 | -1.814843 |
| 6.C  | 1.431859  | 0.641636  | -2.711766 |
| 7.C  | 1.088885  | 0.209826  | -3.999733 |
| 8.C  | 0.187979  | -0.839616 | -3.832156 |
| 9.N  | 0.013968  | -1.016954 | -2.501694 |
| 10.N | 0.718086  | -2.236313 | 0.196947  |
| 11.N | 0.015609  | -2.850922 | -0.792828 |
| 12.C | 0.185254  | -4.191283 | -0.702281 |
| 13.C | 1.034552  | -4.435920 | 0.375346  |
| 14.C | 1.350881  | -3.183201 | 0.917356  |
| 15.N | -1.438630 | -0.429931 | 0.055003  |
| 16.C | -2.516985 | 0.083906  | 0.674951  |
| 17.C | -3.676338 | -0.425704 | 0.066364  |
| 18.C | -3.241109 | -1.280754 | -0.941222 |
| 19.N | -1.886899 | -1.260617 | -0.921289 |
| 20.B | -0.859091 | -2.027011 | -1.747618 |
| 21.H | 1.458341  | 0.612222  | -4.951266 |
| 22.H | 1.382866  | -5.415193 | 0.727105  |
| 23.H | -4.716347 | -0.198450 | 0.332890  |
| 24.C | -0.467235 | -5.153105 | -1.627469 |
| 25.H | -0.185853 | -4.963767 | -2.684715 |
| 26.H | -0.161451 | -6.184625 | -1.367955 |
| 27.H | -1.574651 | -5.094856 | -1.566698 |
| 28.C | 2.224816  | -2.822481 | 2.057479  |
| 29.H | 1.686893  | -2.148576 | 2.758102  |
| 30.H | 2.562940  | -3.728277 | 2.594474  |
| 31.H | 3.112030  | -2.256147 | 1.699894  |
| 32.C | -2.407514 | 1.003340  | 1.832739  |
| 33.H | -3.374053 | 1.510558  | 2.014914  |
| 34.H | -2.119268 | 0.445780  | 2.749331  |
| 35.H | -1.620440 | 1.769323  | 1.673331  |
| 36.C | -4.022849 | -2.106441 | -1.898389 |
| 37.H | -3.827976 | -3.191454 | -1.759858 |
| 38.H | -5.105075 | -1.930529 | -1.747406 |
| 39.H | -3.776990 | -1.862165 | -2.953661 |
| 40.C | 2.364760  | 1.711357  | -2.286950 |
| 41.H | 2.979301  | 2.049309  | -3.142474 |
| 42.H | 1.808044  | 2.587947  | -1.886176 |
| 43.H | 3.028701  | 1.341832  | -1.476560 |
| 44.C | -0.498938 | -1.671627 | -4.853781 |
| 45.H | -0.222431 | -2.743483 | -4.764358 |
| 46.H | -1.603714 | -1.610772 | -4.759817 |
| 47.H | -0.218245 | -1.325906 | -5.866892 |
| 48.H | -1.409994 | -2.762679 | -2.539189 |
| 49.C | 0.761412  | 0.731815  | 3.243787  |
| 50.C | 1.793239  | 1.671206  | 3.062241  |
| 51.C | 0.062210  | 0.714500  | 4.463461  |
| 52.C | 2.113396  | 2.569621  | 4.076375  |
| 53.H | 2.347312  | 1.675960  | 2.110423  |
| 54.C | 0.375868  | 1.614153  | 5.477667  |
| 55.H | -0.732487 | -0.037904 | 4.596169  |
| 56.C | 1.397094  | 2.529596  | 5.263161  |
| 57.H | 2.922466  | 3.307706  | 3.958442  |
| 58.H | -0.161181 | 1.616364  | 6.439211  |
| 59.C | -0.222006 | 2.784148  | -0.272340 |
| 60.C | -0.018622 | 4.119457  | 0.121823  |
| 61.C | -1.119203 | 2.504681  | -1.318243 |
| 62.C | -0.689487 | 5.157551  | -0.516625 |
| 63.H | 0.674680  | 4.311232  | 0.957101  |
| 64.C | -1.791304 | 3.543882  | -1.957815 |
| 65.H | -1.284603 | 1.456568  | -1.615528 |
| 66.C | -1.565715 | 4.849361  | -1.548377 |
| 67.H | -0.547704 | 6.208346  | -0.218438 |
| 68.H | -2.500180 | 3.348856  | -2.777608 |
| 69.F | 1.707400  | 3.411692  | 6.249732  |
| 70.F | -2.227675 | 5.859168  | -2.173164 |

---

---

Tp\*MoO(*p*-C<sub>6</sub>H<sub>4</sub>F)<sub>2</sub><sup>+</sup>

|      |           |           |           |
|------|-----------|-----------|-----------|
| 1.Mo | 0.775846  | 0.018385  | 0.362730  |
| 2.O  | 2.491957  | 0.109585  | 0.537569  |
| 3.O  | 0.444136  | 1.896139  | 0.114658  |
| 4.O  | 0.298641  | -0.036860 | 2.237971  |
| 5.N  | 0.768880  | -0.134380 | -1.800789 |
| 6.C  | 1.507238  | 0.555803  | -2.705611 |
| 7.C  | 1.176726  | 0.093556  | -3.981273 |
| 8.C  | 0.216919  | -0.903450 | -3.807311 |
| 9.N  | -0.011764 | -1.020395 | -2.479050 |
| 10.N | 0.738356  | -2.095063 | 0.190893  |
| 11.N | -0.003020 | -2.770800 | -0.728331 |
| 12.C | 0.230525  | -4.096237 | -0.605040 |
| 13.C | 1.154505  | -4.268927 | 0.428780  |
| 14.C | 1.460737  | -2.996913 | 0.908281  |
| 15.N | -1.467930 | -0.334893 | 0.045133  |
| 16.C | -2.547040 | 0.199647  | 0.660051  |
| 17.C | -3.704507 | -0.341059 | 0.086577  |
| 18.C | -3.277454 | -1.235823 | -0.892611 |
| 19.N | -1.923098 | -1.207155 | -0.894825 |
| 20.B | -0.902059 | -1.998626 | -1.705298 |
| 21.H | 1.597377  | 0.439787  | -4.933679 |
| 22.H | 1.557096  | -5.221152 | 0.796343  |
| 23.H | -4.742954 | -0.112888 | 0.358289  |
| 24.C | -0.426473 | -5.114942 | -1.458861 |
| 25.H | -0.182771 | -4.967335 | -2.531796 |
| 26.H | -0.087937 | -6.125904 | -1.164205 |
| 27.H | -1.531687 | -5.077408 | -1.362653 |
| 28.C | 2.371800  | -2.593148 | 2.000788  |
| 29.H | 1.819780  | -2.060498 | 2.805231  |
| 30.H | 2.862965  | -3.481675 | 2.437949  |
| 31.H | 3.152062  | -1.893147 | 1.631616  |
| 32.C | -2.435508 | 1.171753  | 1.774046  |
| 33.H | -3.409990 | 1.663794  | 1.951810  |
| 34.H | -2.123916 | 0.665692  | 2.712585  |
| 35.H | -1.678284 | 1.955908  | 1.566528  |
| 36.C | -4.069562 | -2.107808 | -1.795867 |
| 37.H | -3.881657 | -3.183336 | -1.592098 |
| 38.H | -5.149657 | -1.918092 | -1.650784 |
| 39.H | -3.827103 | -1.928551 | -2.864137 |
| 40.C | 2.490320  | 1.590900  | -2.309973 |
| 41.H | 3.149928  | 1.833300  | -3.163810 |
| 42.H | 1.984668  | 2.528701  | -1.990244 |
| 43.H | 3.114373  | 1.242143  | -1.459877 |
| 44.C | -0.468142 | -1.743704 | -4.820328 |
| 45.H | -0.209500 | -2.816990 | -4.701029 |
| 46.H | -1.572374 | -1.661352 | -4.746382 |
| 47.H | -0.164397 | -1.429417 | -5.836394 |
| 48.H | -1.449819 | -2.762881 | -2.466180 |
| 49.C | 0.755568  | 0.617281  | 3.324363  |
| 50.C | 1.796517  | 1.559111  | 3.246053  |
| 51.C | 0.138210  | 0.342269  | 4.556767  |
| 52.C | 2.211652  | 2.221871  | 4.393395  |
| 53.H | 2.274065  | 1.765220  | 2.274241  |
| 54.C | 0.553274  | 1.003635  | 5.703648  |
| 55.H | -0.668793 | -0.407500 | 4.586257  |
| 56.C | 1.582817  | 1.934828  | 5.599827  |
| 57.H | 3.018721  | 2.970492  | 4.371486  |
| 58.H | 0.092040  | 0.814794  | 6.685540  |
| 59.C | -0.269044 | 2.825300  | -0.538456 |
| 60.C | 0.037677  | 4.173993  | -0.279128 |
| 61.C | -1.276998 | 2.482639  | -1.457230 |
| 62.C | -0.675044 | 5.178651  | -0.915413 |
| 63.H | 0.831318  | 4.404658  | 0.449369  |
| 64.C | -1.975630 | 3.490566  | -2.107045 |
| 65.H | -1.486650 | 1.419246  | -1.654789 |
| 66.C | -1.669911 | 4.817107  | -1.820331 |
| 67.H | -0.476345 | 6.244706  | -0.724033 |
| 68.H | -2.764744 | 3.266317  | -2.840919 |
| 69.F | -2.358815 | 5.786854  | -2.442931 |
| 70.F | 1.981368  | 2.584474  | 6.705989  |

---
